1 Nutrient dynamics and stream order influence microbial community patterns along a 2914 km  
2 transect of the Mississippi River

3

4

5 Michael W. Henson<sup>1</sup>, Jordan Hanssen<sup>2</sup>, Greg Spooner<sup>2</sup>, Patrick Fleming<sup>2</sup>, Markus Pukonen<sup>2</sup>,  
6 Frederick Stahr<sup>3</sup>, and J. Cameron Thrash<sup>1\*</sup>

7

8 <sup>1</sup>Department of Biological Sciences, Louisiana State University, Baton Rouge, LA 70803,  
9 U.S.A.

10 <sup>2</sup>O.A.R. Northwest, Seattle, WA 98103, U.S.A.

11 <sup>3</sup>School of Oceanography, University of Washington, Seattle, WA 98195, U.S.A.

12

13

14

15 \*Correspondence:

16

17 J. Cameron Thrash

18 Louisiana State University

19 Department of Biological Sciences

20 202 Life Sciences Bldg.

21 Baton Rouge, LA 70803

22 Phone: 225-578-8210

23 Fax: 225-578-2597

24 thrashc@lsu.edu

25

26

27

28

29

30

31

32

33

34

35

36

37 Running title: Microbial regime changes on the Mississippi River

38

39

40 Keywords: Mississippi River, WGCNA, microbial ecology, eutrophication

41 **Abstract**

42 Draining 31 states and roughly 3 million km<sup>2</sup>, the Mississippi River (MSR) and its tributaries  
43 constitute an essential resource to millions of people for clean drinking water, transportation,  
44 agriculture, and industry. Since the turn of the 20<sup>th</sup> century, MSR water quality has continually  
45 rated poorly due to human activity. Acting as first responders, microorganisms can mitigate,  
46 exacerbate, and/or serve as predictors for water quality, yet we know little about their community  
47 structure or ecology at the whole river scale for large rivers. We collected both biological (16S  
48 and 18S rRNA gene amplicons) and physicochemical data from 38 MSR sites over nearly 3000  
49 km from Minnesota to the Gulf of Mexico. Our results revealed a microbial community  
50 composed of similar taxa to other rivers but with unique trends in the relative abundance patterns  
51 among phyla, OTUs, and the core microbiome. Furthermore, we observed a separation in  
52 microbial communities that mirrored the transition from an 8<sup>th</sup> to 10<sup>th</sup> Strahler order river at the  
53 Missouri River confluence, marking a different start to the lower MSR than the historical  
54 distinction at the Ohio River confluence in Cairo, IL. Within MSR microbial assemblages we  
55 identified subgroups of OTUs from the phyla Acidobacteria, Bacteroidetes, Oomycetes, and  
56 Heterokonts that were associated with, and predictive of, the important eutrophication nutrients  
57 nitrate and phosphate. This study offers the most comprehensive view of MSR microbiota to  
58 date, provides important groundwork for higher resolution microbial studies of river  
59 perturbation, and identifies potential microbial indicators of river health related to  
60 eutrophication.

61

62

## 63 **Introduction**

64 By connecting terrestrial, lotic, and marine systems, rivers perform vital roles in both the  
65 transport and processing of compounds in all major global biogeochemical cycles (Richey *et al.*  
66 2002; Ensign and Doyle 2006; Withers and Jarvie 2008; Battin *et al.* 2009; Savio *et al.* 2015).  
67 Within the carbon cycle alone, rivers collectively discharge organic carbon to the oceans at over  
68  $0.4 \text{ Pg C yr}^{-1}$  (Cauwet *et al.* 2002). Perhaps more importantly, rivers are generally net  
69 heterotrophic (Cole *et al.* 2007), indicating that they not only transport organic matter but host  
70 active metabolic processing of it as well. Conservative estimates place heterotrophic output of  
71 the world's fluvial networks (streams, rivers, and estuaries) at  $0.32 \text{ Pg C yr}^{-1}$  (Cole and Caraco  
72 2001; Battin *et al.* 2009). Although rivers contain a small minority of global fresh water at any  
73 given moment, the considerable volumes that pass through these systems make them relevant to  
74 models attempting to quantify global elemental transformations. However, despite the fact that  
75 microbial functions likely play a vital role in ecosystem health for both rivers themselves and  
76 their places of discharge, microbial functions in rivers remain understudied.

77 At 3734 km, the Mississippi River (MSR) is the fourth longest on earth, draining 31 U.S.  
78 states and two Canadian provinces- a watershed consisting of 41% of the continental U.S (Turner  
79 and Rabalais 2003; Dagg *et al.* 2004). The MSR is a major source of drinking water for many  
80 U.S. cities; a critical thoroughfare for transportation, commerce, industry, agriculture, and  
81 recreation; and conveys the vestiges of human activity to the Gulf of Mexico (GOM). In New  
82 Orleans, the average flow rate is over  $16,990 \text{ cubic meters s}^{-1}$  (cms) (Rabalais *et al.* 1996), but  
83 can exceed 84,000 cms during flood stages (Singh 2012), and carries over  $150 \times 10^9 \text{ kg}$  of  
84 suspended sediment into the northern GOM annually (Dagg *et al.* 2004, 2005). The MSR also  
85 transports considerable amounts of carbon, nitrogen and phosphorus, with average annual fluxes

86 of 2.1 TgC yr<sup>-1</sup>, > 1.4 TgN year<sup>-1</sup>, and > 0.14 TgP yr<sup>-1</sup>, respectively (Goolsby and Battaglin 2001;  
87 Cauwet *et al.* 2002; Aulenbach *et al.* 2007). Globally, the MSR represents 0.8% of the dissolved  
88 organic carbon flux to the worlds oceans (Cauwet *et al.* 2002). When considering total nitrogen,  
89 up to 62% can occur as nitrate (NO<sub>3</sub><sup>-</sup>) (Goolsby and Battaglin 2001). This massive discharge of  
90 excess eutrophic nutrients, primarily from corn and soybean (nitrogen) and animal manure  
91 (phosphorus) runoff (McIsaac *et al.* 2001; Turner and Rabalais 2004; Alexander *et al.* 2008;  
92 Schilling *et al.* 2010; Duan *et al.* 2014; Staley *et al.* 2014a), fuels one of the largest marine zones  
93 of seasonal coastal hypoxia in the world (Rabalais *et al.* 2002, 2007; Bianchi *et al.* 2010; Bristow  
94 *et al.* 2015). Studying microbial relationships to river eutrophication will improve our  
95 understanding of their contributions to either mitigating or exacerbating nutrient input.

96 Far from a homogenous jumble of organisms ferried downriver, microbial community  
97 composition changes with distance from the river mouth and/or from the influence of tributaries  
98 (Kolmakova *et al.* 2014; Read *et al.* 2015; Savio *et al.* 2015), resulting from altered nutrient  
99 concentrations (Staley *et al.* 2014a; Van Rossum *et al.* 2015; Meziti *et al.* 2016), differing  
100 dissolved organic matter (DOM) sources (Ruiz-González *et al.* 2013; Zeglin 2015; Blanchet *et*  
101 *al.* 2016), and land use changes (Staley *et al.* 2014b; Van Rossum *et al.* 2015; Zeglin 2015). Past  
102 studies of the Thames, Danube, Yenisei, and Columbia Rivers have found that planktonic river  
103 microbial assemblages were dominated by the phyla Actinobacteria, Proteobacteria, and  
104 Bacteriodetes; and taxa such as acI Actinobacteria, *Polynucleobacter* spp., GKS9 and LD28  
105 *Betaproteobacteria*, CL500-29 Actinobacteria, LD12 SAR11 *Alphaproteobacteria*, and  
106 *Novosphingobium* spp. (Crump *et al.* 1999; Kolmakova *et al.* 2014; Read *et al.* 2015; Savio *et al.*  
107 2015).

108 Specific to the MSR, previous 16S rRNA gene amplicon and metagenomic studies have

109 demonstrated that microbial assemblages in the Minnesota portion of the river (Lake Itasca to La  
110 Crescent) correlated with organic carbon concentration, total dissolved solids, and land use  
111 changes (Staley *et al.* 2013, 2014a; b). Species richness increased near developed land with  
112 greater concentrations of nitrate and nitrite, as opposed to sites near pastureland that had greater  
113 organic carbon (Staley *et al.* 2014a). Similar to past studies of other lotic systems (Crump *et al.*  
114 2012; Read *et al.* 2015; Savio *et al.* 2015), Actinobacteria and Proteobacteria increased in  
115 relative abundance along the upper MSR, while OTUs belonging to Bacteroidetes decreased  
116 (Staley *et al.* 2013). A follow up time-series study over two summers showed a distinct seasonal  
117 signal: samples from late summer of both years were more similar to each other than those from  
118 early summer (Staley *et al.* 2015). A more recent study of another portion of the MSR (above the  
119 Missouri River confluence to Natchez, La.) found bacterial communities formed distinct  
120 regimes, likely due to the strong influence of their respective tributaries (Jackson *et al.* 2014;  
121 Payne *et al.* 2017).

122         Researchers have suggested that some of these patterns supported the application of the  
123 River Continuum Concept (RCC) (Vannote *et al.*, 1980) to river microbiota. The RCC postulates  
124 that as a river increases in size, the influences of riparian and other inputs will decrease as the  
125 river establishes a dominant core community (Vannote *et al.* 1980). Richness will increase with  
126 stream order complexity before decreasing in higher order rivers (Vannote *et al.*, 1980).  
127 Therefore, as continuous systems with increasing volumes and residence times, river microbiota  
128 should transition from experiencing strong influences of mass effects from terrestrial, riverbed,  
129 and tributary sources to systems where species sorting plays a more important role (Crump *et al.*  
130 2012; Besemer *et al.* 2013; Savio *et al.* 2015; Niño-García *et al.* 2016).

131           Accordingly, studies examining the linkages between RCC and microbial structuring  
132 mechanisms (e.g. species sorting, mass effects) have found that some of the results indeed  
133 supported the RCC. Specifically, numerous lotic studies found that upstream and headwaters  
134 amassed high species richness, before richness decreased further downstream (Crump *et al.*  
135 2012; Kolmakova *et al.* 2014; Savio *et al.* 2015; Niño-García *et al.* 2016). This follows the  
136 expected pattern outlined by the RCC where early stream and river microbial communities are  
137 heavily influenced by a large input of allochthonous organisms from sediment and groundwater  
138 into the river network. As the rivers progressed, such mass effects likely heeded to species  
139 sorting, a process requiring an increased water residence time to allow for the selection of  
140 species based on local environmental conditions (Crump *et al.* 2012; Savio *et al.* 2015; Niño-  
141 García *et al.* 2016). These types of river modulations, influenced by hydrology and  
142 environmental conditions, have correlated with decreased species richness and increased core  
143 community membership (the taxa found consistently throughout the entire river) in multiple  
144 systems (Crump *et al.* 2012; Besemer *et al.* 2013; Savio *et al.* 2015; Niño-García *et al.* 2016). An  
145 analyses of an upper portion of the MSR provided evidence for the importance of species sorting  
146 (Staley *et al.* 2015). However, in a study of the Thames River, researchers found no association  
147 between microbial assemblages and any measured variables other than residence time, leading  
148 them to suggest that ecological succession was the primary driver of microbial community  
149 composition (Read *et al.* 2015). Furthermore, a 1300 km transect of the lower MSR indicated  
150 that richness actually increased instead of decreasing in particle-associated, and to a lesser  
151 extent, free-living, communities, suggesting that the MSR may have fundamentally different  
152 mechanisms driving microbial diversity than other rivers (Payne *et al.* 2017).

153 Complicating matters, particle-associated communities in rivers (frequently defined as  
154 those found on filters of  $> \sim 3 \mu\text{m}$  remain distinct from their free-living counterparts (Crump *et*  
155 *al.* 1999; Riemann and Winding 2001; Jackson *et al.* 2014), potentially due to increased  
156 production rates from access to readily obtainable carbon (Crump and Baross 1996; Crump *et al.*  
157 1998, 1999). Typical river microorganisms associated with particles include OTUs related to the  
158 Bacteroidetes clades *Flavobacteria* and *Cytophaga*, Planctomycetes, *Rhizobium* spp., and  
159 *Methylophilaceae* spp. (Crump and Baross 1996; Allgaier and Grossart 2006; D'Ambrosio *et al.*  
160 2014; Jackson *et al.* 2014). However, denoting consistent trends in particle community  
161 composition must be tempered by recent evidence suggesting substrate availability and chemical  
162 queues may trigger organisms to switch between free-living and particle-associated lifestyles  
163 (Grossart 2010; D'Ambrosio *et al.* 2014). Rivers constitute complex and highly dynamic  
164 ecosystems from a metacommunity perspective.

165 Although important insights have been gained from recent research on portions of the  
166 MSR (Staley *et al.* 2013, 2015, 2016; Payne *et al.* 2017), microbiological transects at the whole-  
167 river or catchment scale have yet to be completed. This study aimed to *i*) compare the structure  
168 and abundance of size-fractionated MSR microbial community populations to those in other  
169 rivers, *ii*) examine within-river heterogeneity of microbial communities, and *iii*) identify MSR  
170 microorganisms most strongly associated with eutrophication- all at a near whole-river scale, for  
171 both prokaryotes and microscopic eukaryotes. During the fall of 2014, we completed the most  
172 extensive microbiological survey of the Mississippi River to date with a continual rowed transect  
173 over 70 days. Rowers from the adventure education non-profit OAR Northwest collected  
174 samples from Minneapolis, MN to the Gulf of Mexico (2918 km) (Fig. 1A). Our findings expand  
175 the current information available on microbial assemblages in major lotic ecosystems; further

176 delineate the relationships between microbial structure and stream order, nutrients, and volume;  
177 and identify MSR taxa predictive of the eutrophication nutrients nitrate and phosphate.

178

## 179 **Materials and Methods**

180

### 181 *Sampling and Cell Counts*

182 We used rowboats and a simple filtration protocol (Supplementary Information) to collect  
183 water from 39 sites along a continual-rowed transect of the MSR, starting in Lake Itasca and  
184 ending in the GOM, over 70 days from September 18<sup>th</sup> to November 26<sup>th</sup>, 2014. Sites were  
185 chosen to be near major cities and above and below large tributaries. After some samples were  
186 removed due to insufficient sequence data, contamination, or incomplete metadata (see below),  
187 the final usable set of samples included 38 sites starting at Minneapolis (Fig. 1A, Table S1,  
188 General Information). Most sampling occurred within the body of the river, although due to  
189 safety issues, three samples were collected from shore (Table S1, General Information). We  
190 collected duplicate samples at each site, but because separate rowboat teams frequently collected  
191 these sometimes several dozen meters apart, they cannot be considered true biological replicates  
192 and we have treated them as independent samples.

193 At each site, we filtered 120 mL of water sequentially through a 2.7  $\mu\text{m}$  GF/D filter  
194 (Whatman GE, New Jersey, USA) housed in a 25 mm polycarbonate holder (TISCH, Ohio,  
195 USA) followed by a 0.2  $\mu\text{m}$  Sterivex filter (EMD Millipore, Darmstadt, Germany) with a sterile  
196 60 mL syringe (BD, New Jersey, USA). We refer to fractions collected on the 2.7  $\mu\text{m}$  and 0.22  
197  $\mu\text{m}$  filters as  $> 2.7 \mu\text{m}$  and 0.2-2.7  $\mu\text{m}$ , respectively. Flow-through water from the first 60 mL  
198 was collected in autoclaved acid-washed 60 mL polycarbonate bottles. Both filters were wrapped



199 in parafilm, and together with the filtrate, placed on ice in Yeti Roadie 20 coolers (Yeti, Austin,  
200 TX) until shipment to LSU. Further, 9 mL of whole water for cell counts was added to sterile 15  
201 mL Falcon tubes containing 1 mL of formaldehyde and placed into the cooler. The final cooler  
202 containing samples from sites P-AI had substantial ice-melt. Though our filters were wrapped in  
203 parafilm, we processed melted cooler water alongside our other samples to control for potential  
204 contamination in these filters. Given that some of our samples were expected to contain low  
205 biomass, we also included duplicate process controls for kit contamination (Salter *et al.* 2014;  
206 Weiss *et al.* 2014) with unused sterile filters.

207         Flow-through 0.2  $\mu\text{m}$  filtered water from each collection was analyzed for  $\text{SiO}_4$ ,  $\text{PO}_4^{3-}$ ,  
208  $\text{NH}_4^+$ ,  $\text{NO}_3^-$ , and  $\text{NO}_2^-$  ( $\mu\text{g/L}$ ) at the University of Washington Marine Chemistry Laboratory  
209 (<http://www.ocean.washington.edu/story/Marine+Chemistry+Laboratory>). Aboard-rowboat  
210 measurements were taken for temperature and turbidity. We determined turbidity by deploying a  
211 secchi disk (Wildco, Yulee, FL), while drifting with the current so the line hung vertically. It was  
212 lowered until no longer visible, then raised until just visible, and measured for its distance below  
213 the waterline. We then calculated secchi depth from the average of two measurements.  
214 Temperature was measured with probes from US Water Systems (Indianapolis, IN), rinsed with  
215 distilled water between samples. Samples for cell counts were filtered through a 2.7  $\mu\text{m}$  GF/D  
216 filter, stained with 1x Sybr Green (Lonza), and planktonic cells were enumerated using the  
217 Guava EasyCyte (Millipore) flow cytometer as previously described (Thrash *et al.* 2015).

218         Throughout the transect, seven cooler exchanges occurred to ensure samples were not  
219 exposed to extended durations at *in situ* temperatures. Cooler temperatures were monitored with  
220 HOBO loggers (Onset, Bourne, MA) to ensure that samples stayed at  $\leq 4^\circ\text{C}$ . On average, a  
221 sample spent 7.6 days (median = 6 days, range=1 day minimum, 16 days maximum) at  $\leq 4^\circ\text{C}$

222 before delivery to LSU. Though samples were not frozen immediately, previous research has  
223 provided evidence that soil and water samples stored at 4°C, and for different durations ( $\geq 14$   
224 days), did not show significant alterations to most community relative abundances, structure, or  
225 composition (Lauber *et al.* 2010; Rubin *et al.* 2013; Tatangelo *et al.* 2014).

226

### 227 *DNA extraction and Sequencing*

228 DNA was extracted from both filter fractions and controls using a MoBio PowerWater DNA kit  
229 (MoBio Laboratories, Carlsbad, CA) following the manufacturer's protocol with one minor  
230 modification: in a biosafety cabinet (The Baker Company, Stanford, ME), Sterivex filter  
231 housings were cracked open using sterilized pliers and filters were then removed by cutting  
232 along the edge of the plastic holder with a sterile razor blade before being placed into bead-  
233 beating tubes. DNA was eluted with sterile MilliQ water, quantified using the Qubit2.0  
234 Fluorometer (Life Technologies, Carlsbad, CA), and stored at -20° C. Bacterial and archaeal  
235 sequences were amplified at the V4 region of the 16S rRNA gene using the 515f and 806r primer  
236 set (Caporaso *et al.* 2012), and eukaryotic sequences from the V9 region of the 18S rRNA gene  
237 using the 1391r and EukBR primer set (Amaral-Zettler *et al.* 2009). Amplicons were sequenced  
238 on an Illumina MiSeq as paired-end 250 bp reads at Argonne National Laboratory. Sequencing  
239 of the 16S and 18S rRNA gene amplicons resulted in 13,253,140 and 13,240,531 raw sequences,  
240 respectively.

241

### 242 *Sequence Analysis*

243 We analyzed amplicon data with Mothur v.1.33.3 (Schloss *et al.* 2009) using the Silva v.119  
244 database (Pruesse *et al.* 2007; Quast *et al.* 2013). Briefly, 16S and 18S rRNA gene sequences

245 were assembled into contigs and discarded if the contig had any ambiguous base pairs, possessed  
246 repeats greater than 8 bp, or were greater than 253 or 184 bp in length, respectively. Contigs  
247 were aligned using the Silva rRNA v.119 database, checked for chimeras using UCHIME (Edgar  
248 *et al.* 2011), and classified also using the Silva rRNA v.119 database. Contigs classified as  
249 chloroplast, eukaryotes, mitochondria, or “unknown;” or as chloroplast, bacteria, archaea,  
250 mitochondria, or “unknown;” were removed from 16S or 18S rRNA gene data, respectively. The  
251 remaining contigs were clustered using the `cluster.split()` command into operational taxonomic  
252 units (OTUs) using a 0.03 dissimilarity threshold ( $OTU_{0.03}$ ). After these steps, 146,725 and  
253 131,352 OTUs remained for the 16S and 18S rRNA gene communities, respectively.

254

#### 255 *Sample quality control*

256 To evaluate the potential for contamination from extraction kits, cooler water in the last set of  
257 samples, or leaking/bursting of pre-filters, all samples were evaluated with hierarchical  
258 clustering and NMDS analysis. Hierarchical clustering was performed in R using the *hclust*  
259 function with methods set to “average”, from the *vegan* package (Oksanen *et al.* 2015). Samples  
260 were removed from our analysis if they were observed to be outliers in both the NMDS and  
261 hierarchical clustering such that they grouped with our process controls. The process and cooler  
262 water controls were extreme outliers in both, as was sample L2 (Fig. S1, S2). Sterivex and  
263 prefilter samples generally showed strong separation with the exception of three 16S rRNA gene  
264 samples- STER X2, W2, S2 (Fig. S1, S2). The only other samples that were removed were due  
265 to missing chemical data (Lake Itasca1-2, A1-2) or failed sequencing (16S STER Af1; 16S PRE  
266 S2, X2; 18S PRE O1). Not including process or cooler water controls, 152 samples were  
267 sequenced each for prokaryotic and eukaryotic communities. After these QC measures, 144 and

268 149 samples remained in the analyses from the 16S and 18S rRNA gene amplicons, respectively.  
269 Further, to control for potential contaminants, any OTU with greater 20 reads in the process or  
270 cooler controls was removed from the data set. 146,725 and 131,327 OTUs remained after these  
271 steps for 16S and 18S rRNA gene communities, respectively.

272

### 273 *Alpha and Beta Diversity*

274 OTU<sub>0.03</sub> analyses were completed with the R statistical environment v.3.2.1 (R Development  
275 Core Team 2015). Using the package PhyloSeq (McMurdie and Holmes 2013), alpha-diversity  
276 was first calculated on the non-normalized, unfiltered OTUs using the “estimate richness”  
277 command within PhyloSeq, which calculates six alpha diversity metrics (McMurdie and Holmes  
278 2013). After estimating alpha diversity, potentially erroneous rare OTUs, defined here as those  
279 without at least two sequences in 20% of the sites, were discarded. After this filter, the dataset  
280 contained 950 and 724 16S and 18S rRNA gene OTUs, respectively. For site-specific  
281 community comparisons, OTU counts were normalized using the package DESeq2 (Love *et al.*  
282 2014) with a variance stabilizing transformation (Learman *et al.* 2016). Beta-diversity between  
283 samples was examined using Bray-Curtis distances via ordination with non-metric  
284 multidimensional scaling (NMDS). Analysis of similarity (ANOSIM) was used to test for  
285 significant differences between groups of samples (e.g lower versus upper MSR) using the  
286 *anosim* function in the *vegan* package (Oksanen *et al.* 2015). The influence of Hellinger  
287 transformed environmental parameters on beta-diversity was calculated in R with the *envfit*  
288 function. Relative abundances plots were made using the R package *ggplot2*. Linear and non-  
289 linear regressions were made using the command *stat\_smooth()* with the flag “level=0.95” and  
290 method = “lm” or “loess” for linear and non-linear regressions, respectively.

291  
292 *Network analyses and modeling*  
293 To identify specific OTUs with strong relationships to environmental parameters (e.g. turbidity,  
294  $\text{NO}_3^-$ ), we employed weighted gene co-expression network analysis (WGCNA) (Langfelder and  
295 Horvath 2008) as previously described for OTU relative abundances (Guidi *et al.* 2016). First, a  
296 similarity matrix of nodes (OTUs) was created based on pairwise Pearson correlations across  
297 samples. This was transformed into an adjacency matrix, which represents the strength at which  
298 two OTUs within the matrix are connected (adjacency). To do this, the similarity matrix was  
299 raised to a soft threshold power ( $p$ ;  $p = 6$  for 16S and 18S  $> 2.7 \mu\text{m}$ ,  $p = 4$  for 16S 0.2-2.7  $\mu\text{m}$ ,  $p$   
300  $= 9$  for 18S 0.2-2.7  $\mu\text{m}$ ) that maximizes OTU connections with others and ensures scale-free  
301 topology fit. Submodules of highly co-correlating OTUs were assigned a color (e.g. yellow,  
302 green, turquoise) as defined with a topological overlap measure and hierarchical clustering,  
303 which identified submodules based on an OTU's weighted correlations to other OTUs within and  
304 outside the network. Each submodule, represented by an eigenvalue, was pairwise Pearson  
305 correlated to individual Hellinger-transformed environmental measurements (Figs. S7-10A). To  
306 explore the relationship of submodule structure to these parameters, OTUs within the submodule  
307 were plotted using their individual correlation to the parameter of interest (y-axis, here nitrate or  
308 phosphate) and their submodule membership (x-axis), defined as the strength of an OTU  
309 (number of connections) to other OTUs within the submodule (Figs. S7-10B, D). Strong  
310 correlations between submodule structure and an environmental parameter facilitate  
311 identification of OTUs that are highly correlated to that parameter. To evaluate the predictive  
312 relationship between a submodule and a parameter, we employed partial least square regression  
313 (PLS) analysis. PLS maximizes the covariance between two parameters (e.g., OTU abundances

314 and nitrate concentration) to define the degree to which the measured value (OTU abundance)  
315 can predict the response variable (nutrient concentration). The PLS model was permuted 1000  
316 times and Pearson correlations were calculated between the response variable and leave-one-out  
317 cross-validation (LOOCV) predicted values. Modeled values were then compared with measured  
318 values to determine the explanatory power of the relationships (Figs. S7-10C, E). Relative  
319 contributions of individual OTUs to the PLS regression were calculated using value of  
320 importance in the projection (VIP) (Chong and Jun 2005) determination. PLS was run using the  
321 R package *pls* (Mevik and Wehrens 2007), while VIP was run using additional code found here:  
322 <http://mevik.net/work/software/VIP.R>. Though other environmental parameters had strong  
323 Pearson correlations to submodules, only submodules with strong, positive correlations to  
324 measures related to eutrophication were selected, in accordance with our study objectives, as  
325 these were most likely to provide candidate taxa with remediation potential.

326

### 327 *Accession numbers*

328 Community 16S and 18S rRNA gene sequence fastq files are available at the NCBI Sequence  
329 Read Archive under the accession numbers: SRR3485674 - SRR3485971 and SRR3488881 -  
330 SRR3489315, respectively.

331

### 332 *Code Availability*

333 All code used for Mothur, SeqENV, PhyloSeq, WGCNA, and PLS regression analyses can be  
334 found on the Thrash lab website (<http://thethrashlab.com/publications>) with the reference to this  
335 manuscript linked to “Supplemental Information”.

336

## 337 **Results**

338 Using rowboats and a simple syringe-based filtration protocol, we measured 12 biological,  
339 chemical, and physical parameters (e.g. 16S and 18S rRNA gene communities,  $\text{NH}_4^+$ , river  
340 speed, etc.) from 38 sites along a 2918 km transect of the MSR (Fig. 1A). River order increases  
341 dramatically at the Missouri confluence [eighth to tenth Strahler order (Pierson *et al.* 2008)],  
342 which corresponded to overall discharge (Fig. 1A) and beta diversity changes discussed below.  
343 Therefore, we refer to this juncture as the separator between the upper (0 km – 1042 km, Sites A-  
344 S) and lower MSR (1075-2914 km, Sites T-Al). Within the upper MSR,  $\text{NO}_3^-$ ,  $\text{PO}_4^{3-}$ , and  $\text{NO}_2^-$   
345 were variable but generally increased downriver until peak concentrations near the confluences  
346 of the Illinois and Missouri Rivers. This gave way to lower and more consistent concentrations  
347 along the lower MSR (Fig. 1B). Turbidity (inversely related to secchi disk visibility) increased  
348 steadily downriver to a maximum near the Illinois and Missouri River confluences (1042 km,  
349 Site S) (Fig. 1B, Secchi Disk), then trended downwards for the rest of the transect. Planktonic (<  
350  $2.7 \mu\text{m}$ ) cell counts varied between 1 and  $3 \times 10^6 \text{ cells} \cdot \text{mL}^{-1}$  in the upper MSR, and decreased to  
351 high  $10^5 \text{ cells} \cdot \text{mL}^{-1}$  in the lower MSR (Fig. 1B, Planktonic Cell Counts). Water temperature  
352 ranged from  $19^\circ\text{C}$  (133km, Site E) to  $11.7^\circ\text{C}$  (2552 km, Site Ag), and river speed, excluding  
353 three sites sampled from shore, was between 5.5 mph at Site Y and 0.4 mph (597 km, Site L)  
354 (Table S1, General Information). Spearman rank correlations of the measured environmental  
355 parameters showed strong positive correlations between nitrate, phosphate, distance, and  
356 increased turbidity; while nitrate and phosphate both strongly correlated negatively to water  
357 temperature and river speed (Table S1, Spearman Rank).

358

359 *Bacterial and archaeal communities*

360 We observed a clear distinction between the 0.2-2.7  $\mu\text{m}$  and  $> 2.7 \mu\text{m}$  16S rRNA gene  
361 communities (ANOSIM  $R = 0.65$ ,  $P = 0.001$ ) (Fig. S1A). Both size fractions also showed  
362 significant community separation between sites above and below the Missouri River confluence  
363 (ANOSIM,  $> 2.7 \mu\text{m}$ :  $R = 0.44$ ,  $P = 0.001$ ; 0.2-2.7  $\mu\text{m}$ :  $R = 0.48$ ,  $P = 0.001$ ) (Fig. 2A, B), that the  
364 Eukaryotic fractions mirrored (below)(Fig. 2C, D). Overall richness was significantly higher in  
365 the lower vs. upper rivers (Table S1, Richness comparisons). Taken separately, most  
366 measurements indicated that richness increased with river distance in the upper and lower rivers,  
367 and this trend was common for both the  $> 2.7 \mu\text{m}$  and 0.2-2.7  $\mu\text{m}$  fractions (Fig. S3A, B).  
368 Evenness measurements had less consistent trends.

369 Phosphate and turbidity had the highest correlation with the separation between the upper  
370 and lower  $> 2.7 \mu\text{m}$  communities ( $R^2 = 0.58$ ,  $R^2 = 0.54$ , respectively), with water temperature ( $R^2$   
371  $= 0.52$ ) also contributing (Table 1). At an OTU level, taxa related to the acI clade  
372 (Actinobacteria) and unclassified *Bacillaceae* ( $R^2 > 0.77$ ,  $P = 0.001$ ) contributed most to the  
373 separation between the upper and lower  $> 2.7$  communities, with OTUs related to the *Bacillales*,  
374 *Gemmatimonadaceae*, *Peptococcaceae*, and *Micromonosporaceae* clades also a factor ( $R^2 >$   
375  $0.70$ ,  $P = 0.001$ ) (Table 2). For the 0.2-2.7  $\mu\text{m}$  fraction, nitrate were the strongest correlating  
376 environmental factors with the distinction between upper and lower communities ( $R^2 = 0.443$ ),  
377 although phosphate, turbidity, and water temperature ( $R^2 > 0.385$  for each) also contributed  
378 (Table 1). OTUs related to *Flavobacterium* and an unclassified Bacterium (closest NCBI BLAST  
379 hit *Acidovorax* sp., KM047473), most strongly contributed to the separation between the 0.2-2.7  
380  $\mu\text{m}$  communities ( $R^2 > 0.503$ ,  $P = 0.0001$ ) (Table 2). Other important OTUs driving the  
381 separation between upper and lower communities belonged to the clades Bacteroidetes,  
382 *Microbacteriaceae*, *Clostridiales*, and *Holophagaceae* ( $R^2 > 0.49$ ,  $P = 0.0001$ ) (Table 2).



383           At the phylum level, Proteobacteria, Actinobacteria, and Bacteroidetes dominated  
384 bacterial communities in both fractions (Figs. 3A and B) (Table S1, 16S OTU table norm.).  
385 Proteobacteria abundance in the > 2.7  $\mu\text{m}$  fraction fluctuated over the course of the transect (Fig.  
386 3A), whereas their 0.2-2.7  $\mu\text{m}$  counterparts generally increased in relative abundance downriver  
387 (Fig. 3B). 0.2-2.7  $\mu\text{m}$  Bacteroidetes and Actinobacteria generally decreased in the upper river  
388 and stabilized in the lower river. These phyla showed considerable abundance variation in the >  
389 2.7  $\mu\text{m}$  fraction. Cyanobacteria in the > 2.7  $\mu\text{m}$  fraction negatively correlated with increased  
390 turbidity (Spearman rank = 0.67), consistent with lower irradiance (Fig. 3A). Both > 2.7  $\mu\text{m}$  and  
391 0.2-2.7  $\mu\text{m}$  Acidobacteria increased in abundance downriver and positively correlated with river  
392 distance (Wilcoxon single ranked test,  $P = < 0.01$ ) (Fig. S4A, B). Within the 0.2-2.7  $\mu\text{m}$  fraction,  
393 the five most abundant OTUs were classified as a LD12 (OTU11; Proteobacteria), two acI clade  
394 OTUs (OTU4, OTU7; Actinobacteria), a *Limnohabitans* sp. (OTU2; Proteobacteria), and a LD28  
395 (OTU8; Proteobacteria) (Table S1, 16S OTU table norm.). Comparatively, an unclassified  
396 *Methylophilaceae* (OTU1; Proteobacteria), a *Planktothrix* sp. (OTU12; Cyanobacteria), a NS11-  
397 12 marine group (OTU21; Bacteroidetes), an *Candidatus Aquirestis* sp. (OTU17; Bacteroidetes),  
398 and an unclassified *Sphingobacteriales* (OTU25; Bacteroidetes) were the most abundant OTUs  
399 in the > 2.7  $\mu\text{m}$  fraction (Table S1, 16S OTU table norm.). Archaea occurred at much lower  
400 relative abundances: we found only eight OTUs belonging to the phyla Euryarchaeota and  
401 Thaumarchaeota, collectively. These OTUs were classified as *Methanobacterium* sp. (OTU714,  
402 1968) and soil Crenarchaeotic Group (OTU370, 389, 983, and 1253), *Candidatus*  
403 Nitrosoarchaeum sp. (OTU1093) from the phylum Euryarchaeota, and an unclassified  
404 Thaumarchaeota (OTU2951) from the phylum Thaumarchaeota (Table S1, 16S OTU table  
405 norm.). Overall, Thaumarchaeota increased in abundance along the transect more in the > 2.7  $\mu\text{m}$

406 fraction compared to the 0.2-2.7  $\mu\text{m}$  fraction (Fig. S4A, B). In both fractions, we only detected  
407 Euryarcheota at very low abundances. Importantly, the primers used in this study may miss some  
408 archaeal taxa (Parada *et al.* 2015).

409

#### 410 *Microbial eukaryotic communities*

411 Eukaryotic communities, observed via the 18S rRNA gene, also showed a significant separation  
412 between  $> 2.7 \mu\text{m}$  and 0.2-2.7  $\mu\text{m}$  fractions (ANOSIM  $R = 0.689$ ,  $P = 0.001$ ) (Fig. S1B). As  
413 expected due to generally larger cell sizes in microbial eukaryotes compared to prokaryotes,  
414 species richness remained higher in the  $> 2.7 \mu\text{m}$  vs. 0.2-2.7  $\mu\text{m}$  fractions (Fig. S3C, D). Both  
415 the  $> 2.7 \mu\text{m}$  and 0.2-2.7 fractions also showed a significant separation between the upper and  
416 lower MSR communities (ANOSIM,  $> 2.7 \mu\text{m}$ :  $R = 0.696$ ,  $P = 0.001$ ; 0.2-2.7  $\mu\text{m}$ :  $R = 0.576$ ,  $P =$   
417  $0.001$ ) (Fig. 2C, D). Overall richness in the  $> 2.7 \mu\text{m}$  fraction was also higher in the lower vs.  
418 upper river, but this was not true for the 0.2-2.7  $\mu\text{m}$  fraction (Table S1, Richness comparisons).  
419 Richness in the  $> 2.7 \mu\text{m}$  fraction increased along both the upper and lower river, similarly to  
420 prokaryotic communities, but remained relatively stable within the 0.2-2.7  $\mu\text{m}$  fraction.

421 Phosphate was the top environmental factor correlating to the distinction between  
422 eukaryotic communities in both filter fractions ( $> 2.7 \mu\text{m}$ ,  $R^2 = 0.49$ ; 0.2-2.7 $\mu\text{m}$   $R^2 = 0.56$ )  
423 (Table 1). No other factors had correlations  $> 0.38$  (Table 1). At the OTU level, taxa related to an  
424 unclassified Ochrophyta (OTU63) and an unclassified Eukaryote (OTU1) separated the 0.2-2.7  
425  $\mu\text{m}$  communities ( $R^2 > 0.645$ ,  $P = 0.0001$ ), while the same unclassified Eukaryote OTU (OTU1)  
426 and a second unclassified Eukaryote (OTU222) contributed most to separating the  $> 2.7 \mu\text{m}$   
427 communities ( $R^2 > 0.80$ ,  $P = 0.0001$ ) (Table 2).

428 Stramenopiles (or Heterokonts), encompassing diatoms and many other forms of algae,  
429 and OTUs that could not be classified at the phylum level dominated both the  $> 2.7 \mu\text{m}$  and 0.2-  
430  $2.7 \mu\text{m}$  communities (Fig. 3C, D). Stramenopiles accounted for over 25% of both communities,  
431 with higher abundances in the upper vs. lower river. We observed a similar trend of disparate  
432 abundances between the upper and lower river for  $> 2.7 \mu\text{m}$  Cryptomonadales and 0.2- $2.7 \mu\text{m}$   
433 Nucleotmycea, the latter of which include fungi (Fig. 3C; Table S1, 18S OTU table norm.).  
434 Within the 0.2- $2.7 \mu\text{m}$  fraction, we identified the five most abundant OTUs as three unclassified  
435 *Bacillariophytina* (OTU7, OTU14, OTU9), a *Pythium* sp. (OTU170), and an unclassified  
436 *Cryptomonas* (OTU11) (Table S1, 18S OTU table norm.). Comparatively, two unclassified  
437 *Eukaryotes* (OTU2 and OTU1), an unclassified *Stramenopiles* (OTU3), an unclassified  
438 *Perkinsidae* (OTU13), and an unclassified *Chrysophyceae* (OTU6) had the highest abundance in  
439 the  $> 2.7 \mu\text{m}$  fraction (Table S1, 18S OTU table norm).

440

#### 441 *The Mississippi River Core Microbiome*

442 We defined the core microbiome as those OTUs detectable after normalization in greater than  
443 90% of the sites. The 16S rRNA gene  $> 2.7 \mu\text{m}$  and 0.2- $2.7 \mu\text{m}$  core microbiomes consisted of  
444 82 and 98 OTUs, respectively, classified into eight different phyla- Proteobacteria,  
445 Actinobacteria, Bacteroidetes, Cyanobacteria, Verrucomicrobia, Chloroflexi, Chlorobi,  
446 Gemmatimonadetes- and composed of taxa such as freshwater SAR11 (LD12, Proteobacteria),  
447 *Limnohabitans* sp. (Proteobacteria), *Polynucleobacter* sp. (Proteobacteria), acI clade  
448 (Actinobacteria), LD28 clade (Proteobacteria), and *Planktothrix* sp. (Cyanobacteria) (Table S1,  
449 16S 0.2- $2.7 \mu\text{m}$  Core Comm. and 16S  $> 2.7 \mu\text{m}$  Core Comm.). Core microbome relative  
450 abundance in both fractions decreased along the upper river but stabilized in the lower river (Fig.

451 4A). We confirmed this effect by analyzing the upper and lower core microbiomes separately.  
452 Although the total OTU numbers changed (81 and 116 OTUs in the upper MSR and 160 and 144  
453 OTUs in the lower MSR for the  $> 2.7 \mu\text{m}$  and  $0.2\text{-}2.7 \mu\text{m}$  fractions, respectively), the trends  
454 remained the same (Fig. S5).

455 Eighty OTUs comprised the  $> 2.7 \mu\text{m}$  18S rRNA gene core microbiome (Fig. 4B). We  
456 classified these as *Alveolata*, *Cryptophyceae*, *Nucleomycea*, *Stramenopiles*, or unclassified  
457 Eukaryota (Table S1, 18S  $> 2.7 \mu\text{m}$  Core Comm.). Again, consistent with larger organism sizes,  
458 and thus fewer OTUs overall, the  $0.2\text{-}2.7 \mu\text{m}$  Eukaryotic core microbiome comprised only 21  
459 OTUs (Table S1, 18S  $0.2\text{-}2.7 \mu\text{m}$  Core Comm.). These OTUs consisted of *Alveolata*,  
460 *Nucleomycea*, *Stramenopiles*, or unclassified Eukaryota (Table S1, 18S  $0.2\text{-}2.7 \mu\text{m}$  Core  
461 Comm.). While the  $0.2\text{-}2.7 \mu\text{m}$  core microbiome remained relatively stable along the river, the  $>$   
462  $2.7 \mu\text{m}$  core decreased along the upper MSR before stabilizing in the lower river, similarly to  
463 that of the prokaryotes (Fig. 4B).

464

#### 465 *Network analyses identify taxa associated with and predictive of eutrophication*

466 We applied Weighted Gene Correlation Network Analysis (WGCNA) to identify co-occurring  
467 groups of OTUs (submodules) that also had significant associations with the eutrophication  
468 nutrients phosphate and nitrate. Of the submodules identified through WGCNA as being most  
469 strongly correlated to phosphate and nitrate, we restrict our discussion to those modeled via PLS  
470 analysis to predict  $> 50\%$  of the measured nutrient concentration. Our additional PLS analyses  
471 for those submodules predicting  $< 50\%$  of nitrate and/or phosphate concentrations are included  
472 in Figure S6 and Figure S7-S10.

473 Three submodules in the prokaryotic and eukaryotic fractions were strongly associated  
474 with phosphate. The 0.2-2.7  $\mu\text{m}$  prokaryotic submodule most associated with phosphate was  
475 composed of 51 OTUs (Table 3), and had moderate correlation between the submodule structure  
476 and phosphate (Fig. S7D). Strong correlations between submodule structure and the measured  
477 nutrient suggests that individual submodule OTUs that also have strong correlations to the  
478 nutrient are the most important organisms associated with that nutrient (Langfelder and Horvath  
479 2008). PLS modeling determined that this prokaryotic submodule predicted 80% of measured  
480 phosphate concentrations (Figure S7E, Table 3). Variable importance in the projection (VIP)  
481 analysis found OTUs corresponding to an unclassified *Holophagaceae*, an unclassified  
482 *Gemmatimonadaceae*, and an unclassified *Burkholderiaceae* were the three most important in  
483 the PLS model for phosphate (Fig. 5A, Table S1, 16S 0.2-2.7  $\mu\text{m}$  PO<sub>4</sub>). OTU322 (Acidobacteria  
484 subgroup 6), had moderate correlation to phosphate but high node centrality ( $n = 51$ ; Fig. 5A,  
485 Table S1, 16S 0.2-2.7  $\mu\text{m}$  PO<sub>4</sub>), corroborating evidence that freshwater sediment Acidobacteria  
486 subgroup 6 often occur in co-culture with Alphaproteobacteria and may be metabolically  
487 connected (Kielak *et al.* 2016 and refs. within). A submodule from the 0.2-2.7  $\mu\text{m}$  eukaryotic  
488 fraction was also highly predictive of phosphate (Table 3, Fig. S8D). We identified the top four  
489 VIP taxa as an unclassified *Peronosporomycetes*, an unclassified *Ochrophyta*, an unclassified  
490 Eukaryote, and an unclassified *Stramenopiles* (Fig. 6A, Table S1, 18S 0.2-2.7  $\mu\text{m}$  PO<sub>4</sub>). All four  
491 OTUs had Pearson correlations with phosphate greater than 0.60, among which two were  
492 negative (Fig. 6A, Table S1, 18S 0.2-2.7  $\mu\text{m}$  PO<sub>4</sub>). Unfortunately, the most highly  
493 interconnected OTU within the submodule remained unclassified even at the Phylum level (Fig.  
494 6A, Table S1, 18S 0.2-2.7  $\mu\text{m}$  PO<sub>4</sub>). A  $> 2.7 \mu\text{m}$  eukaryotic submodule could predict 62% of

495 measured phosphate variance (Table 3). An unclassified Eukaryote and an unclassified  
496 *Peronosporomycetes* occupied top two VIP positions (Fig. 6B, Table S1, 16S > 2.7  $\mu\text{m}$  PO<sub>4</sub>).  
497 Only two submodules had strong associations with nitrate. The > 2.7  $\mu\text{m}$  prokaryotic  
498 submodule most strongly correlated with nitrate contained 133 OTUs (Table 3, Fig. S9A).  
499 However, despite a low structural correlation to nitrate, the submodule strongly predicted  
500 measured nitrate in the PLS model (Figure S9B, Table 3). The four highest VIP scoring OTUs  
501 were an *Anabaena* sp., a *Flavobacterium* sp., an unclassified bacterium, and a member of the  
502 *Sphingobacteriales* NS11-12 marine group (Fig. 5B, Table S1, 16S > 2.7  $\mu\text{m}$  NO<sub>3</sub>). OTUs with  
503 the highest node centrality (> 20) belonged to the *Sphingomonadales* (*Alphaproteobacteria*) and  
504 *Sphingobacteriales* (Bacteroidetes), and each positively correlated with nitrate ( $R > 0.48$ , Fig.  
505 5B, Table S1, 16S > 2.7  $\mu\text{m}$  NO<sub>3</sub>). The > 2.7  $\mu\text{m}$  eukaryotic submodule most associated with  
506 nitrate predicted 57% of observed variation in nitrate concentrations (Table 3). OTUs with the  
507 top VIP scores were two unclassified *Chrysophyceae*, an unclassified *Ochrophyta*, and an  
508 unclassified Diatom (Fig. 6C, S10; Table S1, 18S > 2.7  $\mu\text{m}$  NO<sub>3</sub>).

509

## 510 **Discussion**

511 Understanding microbial communities on a whole-river scale is essential for linking the complex  
512 relationships between microorganisms, metabolism, and water quality. At 2914 km, this study is  
513 the largest transect of the MSR to date, and the first to include both prokaryotic and eukaryotic  
514 data by size fractions. This is also the largest river yet surveyed at this level of geographic  
515 completion, which may account for some of its distinctive microbiological features. Although the  
516 MSR comprised similar aquatic microbial taxa found within other rivers (Zwart *et al.* 2002;  
517 Cottrell *et al.* 2005; Ghai *et al.* 2011; Fortunato *et al.* 2013; Jackson *et al.* 2014; Read *et al.* 2015;

518 Savio *et al.* 2015; Meziti *et al.* 2016), it hosted unique relative abundance and core microbiome  
519 trends, indicating that rivers have distinguishing microbiome characteristics. Furthermore, we  
520 observed two different community regimes separated at the Missouri River confluence and  
521 mirrored by the measured physio-chemical properties of the MSR (Fig. 1B). This is an important  
522 hydrological feature of the MSR that strongly influences its microbiology, and further  
523 distinguishes it from other rivers. Our study also identified taxa associated with, and predictive  
524 of, the eutrophication nutrients nitrate and phosphate that provide important targets for future  
525 study and may assist in detecting and quantifying imminent changes in river water quality.

526 MSR microbial communities separated into two distinct fractions of microbial  
527 assemblages, 0.2-2.7  $\mu\text{m}$  and  $> 2.7 \mu\text{m}$  (ANOSIM,  $R = 0.65$ ,  $P = 0.001$ ), throughout the river  
528 transect, a common feature of aquatic ecosystems (DeLong *et al.* 1993; Crump *et al.* 1999;  
529 Allgaier and Grossart 2006; D'Ambrosio *et al.* 2014; Jackson *et al.* 2014). However, despite  
530 sharing similar taxa with other rivers (Ghai *et al.* 2011; Fortunato *et al.* 2012; Crump *et al.* 2012;  
531 Read *et al.* 2015; Savio *et al.* 2015; Meziti *et al.* 2016; Niño-García *et al.* 2016), MSR microbial  
532 community abundances were distinct at a phylum level from previous work on Thames River  
533 (Read *et al.* 2015), Danube River (Savio *et al.* 2015), Canadian Boreal Rivers (Niño-García *et al.*  
534 2016), Toolik catchment (Crump *et al.* 2012), and Yenisei River (Kolmakova *et al.* 2014).  
535 Specifically, within the 0.2-2.7 $\mu\text{m}$  MSR prokaryotic fraction, Proteobacteria remained the most  
536 abundant phylum throughout the river, while Bacteroidetes and Actinobacteria decreased  
537 downriver (Fig. 3). In contrast, other river studies found headwaters dominated by Bacteroidetes  
538 that gave way to more abundant Actinobacteria and Proteobacteria further downriver (Read *et al.*  
539 2015; Savio *et al.* 2015). Similarly, the trends observed in the upper portion of the MSR (Staley  
540 *et al.* 2013), where Bacteroidetes and Actinobacteria decreased while Proteobacteria increased,



541 diverged from the trends found in this study (Fig. 3). Further, while no clear increasing or  
542 decreasing trends were observed in Payne *et al.* (2017), Actinobacteria occurred with the highest  
543 relative abundances in the planktonic fraction, whereas in this study, Proteobacteria were the  
544 most abundant phylum. This may be attributable to the difference in sampling year or possibly  
545 methodology, such as an amplification step that was not undertaken in this work (Payne *et al.*  
546 2017). Furthermore, although many of the dominant taxa found in other rivers also occupied the  
547 MSR (LD12 (freshwater SAR11, *Alphaproteobacteria*), *Limnohabitans* sp.  
548 (*Betaproteobacteria*), LD28 (*Betaproteobacteria*), acI clade (Actinobacteria), and *Algoriphagus*  
549 sp. (Bacteroidetes) (Ghai *et al.* 2011; Fortunato *et al.* 2013; Kolmakova *et al.* 2014; Read *et al.*  
550 2015; Savio *et al.* 2015; Meziti *et al.* 2016), we observed OTU-level abundance differences at a  
551 whole-river scale. For example, OTUs belonging to the acI and LD12 freshwater clades  
552 continually increased in abundance towards the river mouth in the Thames and Danube Rivers  
553 (Read *et al.* 2015; Savio *et al.* 2015), whereas MSR OTUs classified as acI (OTUs 3, 4 and 7)  
554 and LD12 (OTU 11) did not show any distinct change in abundance throughout the transect.  
555 Specific to studies of portions of the MSR,

556       The generally greater richness (Table S1, Richness comparisons) and decreased core  
557 microbial community abundances (Fig. 4) in the lower vs. upper MSR contrasted predictions by  
558 the RCC (Vannote *et al.*, 1980) and observations in previous studies from both large and small  
559 rivers (Read *et al.* 2015; Savio *et al.* 2015, Niño-García *et al.* 2016) where these trends were  
560 reversed. Importantly, we did not sample the true headwaters of the MSR (Lake Itasca to above  
561 St. Cloud), and at the point of first sampling, the MSR already constituted an eighth order river.  
562 Therefore, some of the trends predicted by the RCC may have been missed, although increasing  
563 richness was also observed in the lower MSR during a different year (Payne *et al.* 2017).



564 Ultimately, the variant observations between this MSR survey and other river studies may result  
565 from different sampling methodologies or the particular timing of sampling. Previous studies  
566 conducted on six arctic rivers (Crump *et al.* 2009), two smaller temperate rivers (Parker and  
567 Ipswich Rivers) (Crump and Hobbie 2005), and the upper portion of the MSR (Staley *et al.*  
568 2015) showed that seasonality was important in structuring bacterial communities over three year  
569 and two year sampling periods.

570         However, our observed differences may also stem from biological signal related to  
571 unique environmental conditions, human impacts (Meziti *et al.* 2016; Payne *et al.* 2017), and  
572 changes in hydrology and the level of river engineering (Ruiz-González *et al.* 2013, 2015;  
573 Freimann *et al.* 2015; Niño-García *et al.* 2016) with distance. For instance, the most striking  
574 difference between the MSR and other rivers was the distinct separation of prokaryotic and  
575 eukaryotic community regimes at the Missouri River confluence. This separation matched  
576 physio-chemical changes observed for the MSR such as increased Strahler river order (8 to 10)  
577 and more consistent nutrient concentrations in the lower river compared to the upper (Fig. 1B)  
578 (Pierson *et al.* 2008). These results are bolstered by another observation depicting a major  
579 separation of communities above and below the Missouri confluence, observed during a different  
580 year (2012) and roughly three months prior (late summer) to the current study (Payne *et al.*  
581 2017). This similarity to our results suggests the major influence of the Missouri River  
582 confluence is not seasonally dependent.

583         Although the overall microbial community patterns in the MSR differed from other  
584 rivers, we hypothesize that similar ecological processes drove the separation between the upper  
585 and lower MSR communities, namely changes in the importance of immigration, emigration, and  
586 resource gradient dynamics (Crump *et al.* 2012; Savio *et al.* 2015; Niño-García *et al.* 2016).

587 Specifically, our data suggest that mass effects play a role in structuring microbial communities  
588 in the upper MSR, although instead of only in the headwaters, this process continues for almost a  
589 third of the length of the river, possibly due to contributions from large tributaries and abundant  
590 dams. This contrasts with the conclusion made by Staley *et al.* (2015) for a smaller transect in  
591 the upper MSR, where they suggested species sorting was the primary influence structuring  
592 upper MSR microbial communities. Increased turbidity correlated with decreased core  
593 microbiome relative abundance (Spearman rank correlation,  $> 2.7 \mu\text{m}$   $R = 0.53$ ;  $0.2\text{-}2.7 \mu\text{m}$   $R =$   
594  $0.63$ ) in the upper MSR, and nutrients like phosphate and nitrate continually increased along the  
595 upper river in the current study (Fig. 1B). Similarly, richness also increased along the upper river  
596 (except in the  $0.2\text{-}2.7 \mu\text{m}$  18S communities) (Fig. S3). These patterns are consistent with  
597 communities under the influence of strong mass effects in the upper MSR, whereby inputs from  
598 allochthonous sources continually contributed nutrients, particulate matter, and additional  
599 microbial taxa.

600         Conversely, nitrate, phosphate, turbidity, and core microbiome relative abundance all  
601 stabilized in the lower MSR (Figs. 1B, 4), suggesting a change in the relative influence of  
602 external sources for these variables. We speculate that once the MSR grew to a tenth order river,  
603 its large volume and size buffered it from allochthonous inputs. Nevertheless, overall richness  
604 was greater in the lower river compared to the upper (except in the  $0.2\text{-}2.7 \mu\text{m}$  18S communities)  
605 (Table S1, Richness comparisons), and, like the upper river, richness generally increased in the  
606 lower river (Fig. S3), matching a previous observation (Payne *et al.* 2017). However, since the  
607 relative abundance of core microbiome taxa remained comparatively stable in the lower river  
608 (Fig. 4), increased richness likely occurred primarily from the emergence of low abundance  
609 OTUs. The extent to which a local or regional event impacts downriver populations is dependent

610 on the success of allochthonous taxa associated with such an event to become established within  
611 the autochthonous population (Crump *et al.* 2012; Niño-García *et al.* 2016). The larger the river,  
612 the less likely any newly immigrated taxa will establish dominance. Thus, a plausible scenario  
613 for the regime change observed at the Missouri River confluence is that the influence of mass  
614 effects was drastically reduced by the increased size of the lower river, and that allochthonous  
615 taxa immigrating there were relegated to lower abundances.

616         Alternatively, some of the increase in richness may have occurred through native  
617 community differentiation within the lower river. An overall community shift from a mixture of  
618 allochthonous members to a “native” population requires growth rates greater than residence  
619 time over a given distance (Crump *et al.* 2004). Though river speed increased along the MSR,  
620 the effective residence time also increased since taxa no longer experienced rapidly changing  
621 environmental variables (Fig. 1B). As a result, the lower river may have provided opportunities  
622 for microbial community differentiation based on microniches within the river, which is possible  
623 considering average prokaryotic growth rates (Savio *et al.* 2015), especially among particle-  
624 associated ( $> 2.7 \mu\text{m}$ ) taxa (Crump *et al.* 1998). Thus, although the aggregate patterns in  
625 particular phyla and the overall taxonomic richness within the MSR differ from other systems,  
626 similar ecological processes may still drive these patterns, but the relative proportion of the river  
627 whereby mass effects vs. species sorting dominates fosters unique community assemblages  
628 (Niño-García *et al.* 2016). To resolve the relative importance of mass effects vs. species sorting  
629 in the upper and lower rivers, future work will need to incorporate explicit measurements of  
630 immigrating and emigrating taxa, as well as growth rates for different organisms at different  
631 geographic positions.

632           Within this dynamic river system, we also sought to define the microorganisms most  
633 associated with eutrophication nutrients to provide specific taxa for future study of nitrate and  
634 phosphate uptake and/or metabolism, and also as plausible biological indicators of river trophic  
635 state. By focusing on OTUs with the highest VIP scores in the PLS models, we identified several  
636 bacterial and eukaryotic taxa that fit these criteria (Figs. 5, 6). Organisms in the  
637 *Sphingomonadaceae* (e.g., *Novosphingobium* spp.) contributed strongly to the PLS models  
638 predicting nitrate with both  $> 2.7 \mu\text{m}$  (Fig. 5B) and  $0.2\text{-}2.7 \mu\text{m}$  (Fig. S6A) size fractions (Table  
639 S1, 16S  $0.2\text{-}2.7 \mu\text{m}$  VIP NO<sub>3</sub> and 16S  $> 2.7 \mu\text{m}$  VIP NO<sub>3</sub>). *Novosphingobium* spp. isolates have  
640 previously been associated with eutrophic environments (Trusova and Gladyshev 2002; Zwart *et*  
641 *al.* 2002; Addison *et al.* 2007; Li *et al.* 2012) and some can reduce nitrate (Addison *et al.* 2007;  
642 Li *et al.* 2012), making these specific OTUs candidates for nitrate metabolism in the river water  
643 column. An *Anabaena* sp. (OTU40) from the core microbiome (Table S1, 16S  $> 2.7 \mu\text{m}$  Core  
644 Comm.) had the top VIP score within the  $> 2.7 \mu\text{m}$  submodule that could predict 69% of nitrate  
645 concentrations, and correlated negatively with nitrate (Table 3, Fig. 5B). The nitrogen-fixing  
646 *Anabaena* spp. (Allen and Arnon 1955) typically bloom in low dissolved inorganic nitrogen  
647 (DIN) conditions (Wood *et al.* 2010), making the absence of these consistent with high DIN. An  
648 unclassified *Holophagaceae* OTU (OTU33) had the highest VIP score within the prokaryotic  
649  $0.2\text{-}2.7 \mu\text{m}$  submodule that predicted 80% of the variance in phosphate concentrations (Table 3,  
650 Fig. 5A). This same OTU was also a key driver of the beta diversity separation between upper  
651 and lower river communities (Table 2), and a member of the core microbiome (Table S1, 16S  
652  $0.2\text{-}2.7 \mu\text{m}$  Core Comm.). The *Holophagaceae* belong to the Acidobacteria phylum, and the  
653 Ohio River contained a much higher abundance of Acidobacteria relative to other tributaries in a  
654 previous study (Jackson *et al.* 2014). Notably, Acidobacteria increased with river distance in our

655 study as well (Fig. S4), with a peak in the 0.2-2.7  $\mu\text{m}$  fraction near the Arkansas River  
656 confluence. This increase in “free-living” Acidobacteria downriver is distinct from other whole  
657 river studies, making these organisms, and the *Holophagaceae* OTUs in particular, potentially  
658 important organisms for the MSR river basin specifically.

659         Within Eukaryotes, multiple different algae, diatom, and Oomycetes OTUs occupied  
660 submodules highly predictive of nitrate and phosphate (Fig. 6A-C), and specifically  
661 *Chrysophyceae* taxa from both size fractions correlated strongly with nitrate (Fig. 6C, Fig. S6E).  
662 *Chrysophyceae* (golden algae) commonly occupy river systems (Necchi Jr 2016) including the  
663 MSR (Korajkic *et al.* 2015), can be autotrophic and mixotrophic (Jansson *et al.* 1996), and may  
664 serve as predators of prokaryotes (Caron *et al.* 1990). Further, multiple OTUs classified as  
665 *Peronosporomycetes* were important in predicting phosphate in both size fractions (Fig 6A, B,  
666 Table S1, 18S 0.2-2.7  $\mu\text{m}$  VIP PO<sub>4</sub> and 18S > 2.7  $\mu\text{m}$  VIP PO<sub>4</sub>). *Peronosporomycetes* are  
667 fungus-like eukaryotic organisms known to be pathogenic in fish, plants, and mammals (Dick  
668 2003; Islam and von Tiedemann 2011). While we also identified many other eukaryotic OTUs as  
669 important predictors of nutrients, poor taxonomic resolution hindered our ability to discuss them  
670 further. Improved cultivation and systematics of key microbial eukaryotes will be vital to  
671 understanding river nutrient dynamics.

672         While the most geographically comprehensive analysis to date for the MSR, this study  
673 only encompasses a snapshot in time. As noted previously, seasonal changes that have been  
674 observed in other rivers (Crump and Hobbie 2005; Crump *et al.* 2009; Smith *et al.* 2010;  
675 Fortunato *et al.* 2013; Staley *et al.* 2015) undoubtedly influence this dynamic system, though the  
676 permanence of the regime change at the Missouri River confluence remains in question. Future  
677 studies should incorporate microbial responses, at a whole-river scale, to seasonal pulse events

678 (e.g. rain, snow melt), and how river size and volume may buffer local microbial communities  
679 from allochthonous inputs (Zeglin 2015). Our current research highlights the distinctiveness of  
680 MSR microbial communities and the complexities influencing their structure within the MSR  
681 ecosystem. The observed association between changes in Strahler's river order, nutrient  
682 dynamics, and community composition indicates the importance of hydrology on the spatial  
683 dynamics structuring microbial communities (Freimann *et al.* 2015; Zeglin 2015; Niño-García *et*  
684 *al.* 2016) and provides baseline information for future MSR studies that incorporate greater  
685 temporal and spatial resolution. With river water quality of growing local and global importance  
686 (Vorosmarty *et al.* 2010; Russell and Weller 2013), the candidate taxa predictive of eutrophic  
687 nutrients determined herein also provide important targets for further research into their roles for  
688 indicating, and potentially improving, river health.

689

#### 690 **Acknowledgements**

691 This work was supported by the Louisiana State University Department of Biological Sciences,  
692 College of Science, and Office of Research and Economic Development; and the College of the  
693 Environment at the University of Washington. Portions of this research were conducted with  
694 high performance computing resources provided by Louisiana State University  
695 (<http://www.hpc.lsu.edu>). The authors thank Dr. Caroline Fortunato and Dr. Gary King for  
696 thoughtful comments on the manuscript. The authors also thank the countless volunteers,  
697 schools, and organizations that facilitated the research. We specifically thank Pete Weess, Jessica  
698 Zimmerman, Katy Welch, Brian Moffitt, and David Cheney for helping organize the shipment of  
699 coolers between sites, and the OAR Northwest sponsors- Seattle Yacht Club Foundation, Yeti  
700 Coolers, and the National Mississippi River Museum and Aquarium. A full list of sponsors and

701 volunteers can be found on the OAR Northwest website ([oarnorthwest.org](http://oarnorthwest.org)). We would also like  
702 to thank Dr. Matthew Sullivan and Dr. Simon Roux for their help with coding the WGCNA and  
703 sPLS analyses. Lastly, we would like to thank Mrs. Ginger Thrash, who connected the Thrash  
704 lab to OAR Northwest.

705

## 706 **Conflict of Interest**

707 The authors declare no competing financial interests.

## 708 **References**

- 709 Addison, S. L., S. M. Foote, N. M. Reid, and G. Lloyd-Jones. 2007. *Novosphingobium*  
710 *nitrogenifigans* sp. nov., a polyhydroxyalkanoate-accumulating diazotroph isolated from a  
711 New Zealand pulp and paper wastewater. *Int. J. Syst. Evol. Microbiol.* **57**: 2467–2471.
- 712 Alexander, R. B., R. A. Smith, G. E. Schwarz, E. W. Boyer, J. V. Nolan, and J. W. Brakebill.  
713 2008. Differences in phosphorus and nitrogen delivery to the Gulf of Mexico from the  
714 Mississippi River Basin. *Environ. Sci. Technol.* **42**: 822–830.
- 715 Allen, M. B., and D. I. Arnon. 1955. Studies on nitrogen-fixing blue-green algae. I. Growth and  
716 nitrogen fixation by *Anabaena cylindrica* Lemm. *Plant Physiol.* **30**: 366.
- 717 Allgaier, M., and H.P. Grossart. 2006. Seasonal dynamics and phylogenetic diversity of free-  
718 living and particle-associated bacterial communities in four lakes in northeastern Germany.  
719 *Aquat. Microb. Ecol.* **45**: 115–128.
- 720 Amaral-Zettler, L. A., E. A. McCliment, H. W. Ducklow, and S. M. Huse. 2009. A Method for  
721 Studying Protistan Diversity Using Massively Parallel Sequencing of V9 Hypervariable  
722 Regions of Small-Subunit Ribosomal RNA Genes. *PLoS One* **4**: e6372.
- 723 Aulenbach, B. T., H. T. Buxton, W. A. Battaglin, and R. H. Coupe. 2007. Streamflow and  
724 nutrient fluxes of the Mississippi-Atchafalaya River Basin and subbasins for the period of  
725 record through 2005.
- 726 Battin, T. J., L. a. Kaplan, S. Findlay, C. S. Hopkinson, E. Marti, A. I. Packman, J. D. Newbold,  
727 and F. Sabater. 2009. Biophysical controls on organic carbon fluxes in fluvial networks.  
728 *Nat. Geosci.* **2**: 595–595.
- 729 Besemer, K., G. Singer, C. Quince, E. Bertuzzo, W. Sloan, and T. J. Battin. 2013. Headwaters  
730 are critical reservoirs of microbial diversity for fluvial networks. *Proc. Biol. Sci.* **280**:  
731 20131760.
- 732 Bianchi, T. S., S. F. DiMarco, J. H. Cowan, R. D. Hetland, P. Chapman, J. W. Day, and M. A.  
733 Allison. 2010. The science of hypoxia in the northern Gulf of Mexico: A review. *Sci. Total*  
734 *Environ.* **408**: 1471–1484.
- 735 Blanchet, M., O. Pringault, C. Panagiotopoulos, D. Lefèvre, B. Charrière, J.F. Ghiglione, C.  
736 Fernandez, F. L. Aparicio, C. Marrasé, P. Catala, L. Oriol, J. Caparros, and F. Joux. 2016.  
737 When riverine dissolved organic matter (DOM) meets labile DOM in coastal waters:  
738 changes in bacterial community activity and composition. *Aquat. Sci.* , doi:10.1007/s00027-



- 739 016-0477-0
- 740 Bristow, L. A., N. Sarode, J. Cartee, A. Caro-Quintero, B. Thamdrup, and F. J. Stewart. 2015.
- 741 Biogeochemical and metagenomic analysis of nitrite accumulation in the Gulf of Mexico
- 742 hypoxic zone. *Limnol. Oceanogr.* **60**: 1733–1750.
- 743 Caporaso, J. G., C. L. Lauber, W. a Walters, D. Berg-Lyons, J. Huntley, N. Fierer, S. M. Owens,
- 744 J. Betley, L. Fraser, M. Bauer, N. Gormley, J. a Gilbert, G. Smith, and R. Knight. 2012.
- 745 Ultra-high-throughput microbial community analysis on the Illumina HiSeq and MiSeq
- 746 platforms. *ISME J.* **6**: 1621–1624.
- 747 Caron, D. A., K. G. Porter, and R. W. Sanders. 1990. Carbon, nitrogen, and phosphorus budgets
- 748 for the mixotrophic phytoflagellate *Poteroochromonas malhamensis* (Chrysophyceae)
- 749 during bacterial ingestion. *Limnol. Oceanogr.* **35**: 433–443.
- 750 Cauwet, G., D. A. Hansell, and C. A. Carlson. 2002. DOM in the coastal zone, p. 579–609. *In*
- 751 *Biogeochemistry of marine dissolved organic matter*. Academic Press, San Diego, CA.
- 752 Chong, I. G., and C. H. Jun. 2005. Performance of some variable selection methods when
- 753 multicollinearity is present. *Chemom. Intell. Lab. Syst.* **78**: 103–112.
- 754 Cole, J. J., and N. F. Caraco. 2001. Carbon in catchments: Connecting terrestrial carbon losses
- 755 with aquatic metabolism. *Marine and Freshwater Research.* 101–110.
- 756 Cole, J. J., Y. T. Prairie, N. F. Caraco, W. H. McDowell, L. J. Tranvik, R. G. Striegl, C. Duarte,
- 757 P. Kortelainen, J. A. Downing, J. J. Middelburg, and J. M. Melack. 2007. Plumbing the
- 758 global carbon cycle: Integrating inland waters into the terrestrial carbon budget. *Ecosystems*
- 759 **10**: 171–184.
- 760 Cottrell, M. T., L. A. Waidner, L. Yu, and D. L. Kirchman. 2005. Bacterial diversity of
- 761 metagenomic and PCR libraries from the Delaware River. *Environ. Microbiol.* **7**: 1883–
- 762 1895.
- 763 Crump, B. C., L. A. Amaral-Zettler, and G. W. Kling. 2012. Microbial diversity in arctic
- 764 freshwaters is structured by inoculation of microbes from soils. *ISME J* **6**: 1629–1639.
- 765 Crump, B. C., E. V. Armbrust, and J. A. Baross. 1999. Phylogenetic Analysis of Particle-
- 766 Attached and Free-Living Bacterial Communities in the Columbia River, Its Estuary, and
- 767 the Adjacent Coastal Ocean. *Appl. Environ. Microbiol.* **65**: 3192–3204.
- 768 Crump, B. C., and J. A. Baross. 1996. Particle-attached bacteria and heterotrophic plankton
- 769 associated with the Columbia River estuarine turbidity maxima. *Part. Bact. heterotrophic*
- 770 *Plankt. Assoc. with Columbia River Estuar. Turbid. maxima*
- 771 Crump, B. C., J. A. Baross, and C. A. Simenstad. 1998. Dominance of particle-attached bacteria
- 772 in the Columbia River estuary, USA. *Aquat. Microb. Ecol.* **14**: 7–18.
- 773 Crump, B. C., and J. E. Hobbie. 2005. Synchrony and seasonality in bacterioplankton
- 774 communities of two temperate rivers. *Limnol. Oceanogr.* **50**: 1718–1729.
- 775 Crump, B. C., C. S. Hopkinson, M. L. Sogin, and J. E. Hobbie. 2004. Microbial Biogeography
- 776 along an Estuarine Salinity Gradient: Combined Influences of Bacterial Growth and
- 777 Residence Time. *Appl. Environ. Microbiol.* **70**: 1494–1505.
- 778 Crump, B. C., B. J. Peterson, P. A. Raymond, R. M. W. Amon, A. Rinehart, J. W. McClelland,
- 779 and R. M. Holmes. 2009. Circumpolar synchrony in big river bacterioplankton. *Proc. Natl.*
- 780 *Acad. Sci.* **106**: 21208–21212.
- 781 D’Ambrosio, L., K. Ziervogel, B. Macgregor, A. Teske, and C. Arnosti. 2014. Composition and
- 782 enzymatic function of particle-associated and free-living bacteria: a coastal/offshore
- 783 comparison. *ISME J.* 1–13.
- 784 Dagg, M., R. Benner, S. Lohrenz, and D. Lawrence. 2004. Transformation of dissolved and



- 785 particulate materials on continental shelves influenced by large rivers: Plume processes.  
786 *Cont. Shelf Res.* **24**: 833–858.
- 787 Dagg, M. J., T. S. Bianchi, G. A. Breed, W. J. Cai, S. Duan, H. Liu, B. A. McKee, R. T. Powell,  
788 and C. M. Stewart. 2005. Biogeochemical characteristics of the lower Mississippi River,  
789 USA, during June 2003. *Estuaries* **28**: 664–674.
- 790 DeLong, E. F., D. G. Franks, and A. Alldredge. 1993. Phylogenetic diversity of aggregate-  
791 attached vs. free-living marine bacteria assemblages. *Limnol. Ocean.* **38**: 924–934.
- 792 Dick, M. . 2003. Straminipilous Fungi: Systematics of the Peronosporomycetes Including  
793 Accounts of the Marine Straminipilous Protists, the Plasmodiophorids and Similar  
794 Organisms. *Mycopathologia* **156**: 385–386.
- 795 Duan, S., R. T. Powell, and T. S. Bianchi. 2014. High frequency measurement of nitrate  
796 concentration in the Lower Mississippi River, USA. *J. Hydrol.* **519**: 376–386.
- 797 Edgar, R. C., B. J. Haas, J. C. Clemente, C. Quince, and R. Knight. 2011. UCHIME improves  
798 sensitivity and speed of chimera detection. *Bioinformatics* **27**: 2194–2200.
- 799 Ensign, S. H., and M. W. Doyle. 2006. Nutrient spiraling in streams and river networks. *J.*  
800 *Geophys. Res. Biogeosciences* **111**, doi:10.1029/2005JG000114
- 801 Fortunato, C. S., A. Eiler, L. Herfort, J. A. Needoba, T. D. Peterson, B. C. Crump. 2013.  
802 Determining indicator taxa across spatial and seasonal gradients in the Columbia River  
803 coastal margin. *ISME J* **7**: 1899–1911.
- 804 Fortunato, C. S., L. Herfort, P. Zuber, A. M. Baptista, and B. C. Crump. 2012. Spatial variability  
805 overwhelms seasonal patterns in bacterioplankton communities across a river to ocean  
806 gradient. *ISME J* **6**: 554–563.
- 807 Freimann, R., H. Bürgmann, S. E. G. Findlay, and C. T. Robinson. 2015. Hydrologic linkages  
808 drive spatial structuring of bacterial assemblages and functioning in alpine floodplains TL -  
809 6. *Front. Microbiol.* **6** VN-re, doi:10.3389/fmicb.2015.01221
- 810 Van Geel, B., L. R. Mur, M. Ralska-Jasiewiczowa, and T. Goslar. 1994. Fossil akinetes of  
811 *Aphanizomenon* and *Anabaena* as indicators for medieval phosphate-eutrophication of Lake  
812 Gosciaz (Central Poland). *Rev. Palaeobot. Palynol.* **83**: 97–105.
- 813 Ghai, R., F. Rodríguez-Valera, K. D. McMahon, D. Toyama, R. Rinke, T. C. S. de Oliveira, J.  
814 W. Garcia, F. P. de Miranda, and F. Henrique-Silva. 2011. Metagenomics of the water  
815 column in the pristine upper course of the Amazon river. *PLoS One* **6**,  
816 doi:10.1371/journal.pone.0023785
- 817 Goolsby, D. A., and W. A. Battaglin. 2001. Long-term changes in concentrations and flux of  
818 nitrogen in the Mississippi River basin, USA. *Hydrol. Process.* **15**: 1209–1226.
- 819 Grossart, H. P. 2010. Ecological consequences of bacterioplankton lifestyles: Changes in  
820 concepts are needed. *Environ. Microbiol. Rep.* **2**: 706–714.
- 821 Guidi, L., S. Chaffron, L. Bittner, D. Eveillard, A. Larhlimi, S. Roux, Y. Darzi, S. Audic, L.  
822 Berline, and J. R. Brum. 2016. Plankton networks driving carbon export in the oligotrophic  
823 ocean. *Nature*
- 824 Islam, M. T., and A. von Tiedemann. 2011. 2,4-Diacetylphloroglucinol suppresses  
825 zoosporogenesis and impairs motility of Peronosporomycete zoospores. *World J. Microbiol.*  
826 *Biotechnol.* **27**: 2071–2079.
- 827 Jackson, C. R., J. J. Millar, J. T. Payne, and C. A. Ochs. 2014. Free-living and particle-associated  
828 bacterioplankton in large rivers of the Mississippi River Basin demonstrate biogeographic  
829 patterns. *Appl. Environ. Microbiol.* **80**: 7186–7195.
- 830 Jansson, M., P. Blomqvist, A. Jonsson, and A. Bergström. 1996. Nutrient limitation of

- 831 bacterioplankton, autotrophic and mixotrophic phytoplankton, and heterotrophic  
832 nanoflagellates in Lake Öträsket. *Limnol. Oceanogr.* **41**: 1552–1559.
- 833 Kielak, A. M., C. C. Barreto, G. A. Kowalchuk, J. A. van Veen, and E. E. Kuramae. 2016. The  
834 Ecology of Acidobacteria: Moving beyond Genes and Genomes. *Front. Microbiol.* **7**: 744.
- 835 Kolmakova, O. V., M. I. Gladyshev, A. S. Rozanov, S. E. Peltek, and M. Y. Trusova. 2014.  
836 Spatial biodiversity of bacteria along the largest Arctic river determined by next-generation  
837 sequencing. *FEMS Microbiol. Ecol.* **89**: 442–450.
- 838 Korajkic, A., L. W. Parfrey, B. R. McMinn, Y. V. Baeza, W. VanTeuren, R. Knight, and O. C.  
839 Shanks. 2015. Changes in bacterial and eukaryotic communities during sewage  
840 decomposition in Mississippi river water TL - 69. *Water Res.* **69** VN-r: 30–39.
- 841 Langfelder, P., and S. Horvath. 2008. WGCNA: an R package for weighted gene co-expression  
842 network analysis. *BMC Bioinformatics* **9**: 559.
- 843 Lauber, C. L., N. Zhou, J. I. Gordon, R. Knight, and N. Fierer. 2010. Effect of storage conditions  
844 on the assessment of bacterial community structure in soil and human-associated samples.  
845 *FEMS Microbiol. Lett.* **307**: 80–86.
- 846 Learman, D. R., M. W. Henson, J. C. Thrash, B. Temperton, P. M. Brannock, S. R. Santos, A. R.  
847 Mahon, and K. M. Halanych. 2016. Biogeochemical and microbial variation across 5500  
848 km of Antarctic surface sediment implicates organic matter as a driver of benthic  
849 community structure. *Front. Microbiol.* **7**, doi:10.3389/fmicb.2016.00284
- 850 Li, H.-F., Z. T. Zou, B. Z. Li, X. Wang, J. S. Yang, and H. L. Yuan. 2012. *Novosphingobium*  
851 *sediminis* sp. nov., isolated from the sediment of a eutrophic lake. *J. Gen. Appl. Microbiol.*  
852 **58**: 357–362.
- 853 Love, M. I., S. Anders, and W. Huber. 2014. Differential analysis of count data - the DESeq2  
854 package. *Genome Biol.* **15**: 550.
- 855 McIsaac, G. F., M. B. David, G. Z. Gertner, and D. a Goolsby. 2001. Nitrate flux in the  
856 Mississippi River. *Nature* **414**: 166–167.
- 857 McMurdie, P. J., and S. Holmes. 2013. phyloseq: An R Package for Reproducible Interactive  
858 Analysis and Graphics of Microbiome Census Data. *PLoS One* **8**: e61217.
- 859 Mevik, B. H., and R. Wehrens. 2007. The pls Package: Principle Component and Partial Least  
860 Squares Regression in R. *J. Stat. Softw.* **18**: 1–24.
- 861 Meziti, A., D. Tsementzi, K. Ar. Kormas, H. Karayanni, and K. T. Konstantinidis. 2016.  
862 Anthropogenic effects on bacterial diversity and function along a river-to-estuary gradient  
863 in Northwest Greece revealed by metagenomics. *Environ. Microbiol.*
- 864 Necchi Jr, O. 2016. Heterokonts (Xanthophyceae and Chrysophyceae) in Rivers, p. 153–158. *In*  
865 *River Algae*. Springer.
- 866 Niño-García, J. P., C. Ruiz-González, and P. A. del Giorgio. 2016. Interactions between  
867 hydrology and water chemistry shape bacterioplankton biogeography across boreal  
868 freshwater networks. *ISME J.* , doi:10.1038/ismej.2015.226
- 869 Oksanen, J., F. G. Blanchet, R. Kindt, P. Legendre, P. R. Minchin, R. B. O’Hara, G. L. Simpson,  
870 P. Solymos, M. H. H. Stevens, and H. Wagner. 2015. vegan: Community Ecology Package.  
871 R package version 2.2-1. *R Packag. version 1*: R package version 2.2-1.
- 872 Parada, A. E., D. M. Needham, and J. A. Fuhrman. 2015. Every base matters: assessing small  
873 subunit rRNA primers for marine microbiomes with mock communities, time series and  
874 global field samples. *Environ. Microbiol.*
- 875 Payne, J. T., J. J. Millar, C. R. Jackson, and C. A. Ochs. 2017. Patterns of variation in diversity  
876 of the Mississippi river microbiome over 1,300 kilometers. *PLoS One* **12**: e0174890.

- 877 Pierson, S. M., B. J. Rosenbaum, L. D. McKay, and T. G. Dewald. 2008. Strahler Stream Order  
878 and Strahler Calculator Values in NHDPlus.
- 879 Pruesse, E., C. Quast, K. Knittel, B. M. Fuchs, W. Ludwig, J. Peplies, F. O. Glockner, and F. O.  
880 Glöckner. 2007. SILVA: a comprehensive online resource for quality checked and aligned  
881 ribosomal RNA sequence data compatible with ARB. *Nucleic Acids Res.* **35**: 7188–7196.
- 882 Quast, C., E. Pruesse, P. Yilmaz, J. Gerken, T. Schweer, P. Yarza, J. Peplies, and F. O. Glöckner.  
883 2013. The SILVA ribosomal RNA gene database project: Improved data processing and  
884 web-based tools. *Nucleic Acids Res.* **41**: 590–596.
- 885 Rabalais, N. N., R. E. Turner, B. K. Sen Gupta, D. F. Boesch, P. Chapman, and M. C. Murrell.  
886 2007. Hypoxia in the northern Gulf of Mexico: Does the science support the Plan to  
887 Reduce, Mitigate, and Control Hypoxia? *Estuaries and Coasts* **30**: 753–772.
- 888 Rabalais, N. N., R. E. Turner, D. Justić, Q. Dortch, W. J. Wiseman, B. K. Sen Gupta, and D.  
889 Justic. 1996. Nutrient Changes in the Mississippi River and System Responses on the  
890 Adjacent Continental Shelf. *Estuaries* **19**: 386.
- 891 Rabalais, N. N., R. E. Turner, and W. J. Wiseman. 2002. Gulf of Mexico Hypoxia, a.K.a. “the  
892 Dead Zone.” *Annu. Rev. Ecol. Syst.* **33**: 235–263.
- 893 R Development Core Team. 2015. R: A Language and Environment for Statistical Computing.  
894 R Found. Stat. Comput. **1**: 409.
- 895 Read, D. S., H. S. Gweon, M. J. Bowes, L. K. Newbold, D. Field, M. J. Bailey, and R. I.  
896 Griffiths. 2015. Catchment-scale biogeography of riverine bacterioplankton. *ISME J* **9**:  
897 516–526.
- 898 Richey, J. E., J. M. Melack, A. K. Aufdenkampe, V. M. Ballester, and L. L. Hess. 2002.  
899 Outgassing from Amazonian rivers and wetlands as a large tropical source of atmospheric  
900 CO<sub>2</sub>. *Nature* **416**: 617–620.
- 901 Riemann, L., and A. Winding. 2001. Community dynamics of free-living and particle-associated  
902 bacterial assemblages during a freshwater phytoplankton bloom. *Microb. Ecol.* **42**: 274–  
903 285.
- 904 Van Rossum, T., M. A. Peabody, M. I. Uyaguari-Diaz, K. I. Cronin, M. Chan, J. R. Slobodan,  
905 M. J. Nesbitt, C. A. Suttle, W. W. L. Hsiao, P. K. C. Tang, N. A. Prystajek, and F. S. L.  
906 Brinkman. 2015. Year-long metagenomic study of river microbiomes across land use and  
907 water quality. *Front. Microbiol.* **6**: 1–15.
- 908 Rubin, B. E. R., S. M. Gibbons, S. Kennedy, J. Hampton-Marcell, S. Owens, and J. A. Gilbert.  
909 2013. Investigating the Impact of Storage Conditions on Microbial Community  
910 Composition in Soil Samples. *PLoS One* **8**: 1–9.
- 911 Ruiz-González, C., L. Proia, I. Ferrera, J. M. Gasol, and S. Sabater. 2013. Effects of large river  
912 dam regulation on bacterioplankton community structure. *FEMS Microbiol. Ecol.* **84**: 316–  
913 331.
- 914 Ruiz-González, C., G. Salazar, R. Logares, L. Proia, J. M. Gasol, and S. Sabater. 2015. Weak  
915 Coherence in Abundance Patterns Between Bacterial Classes and Their Constituent OTUs  
916 Along a Regulated River. *Front. Microbiol.* **6**: 1293.
- 917 Russell, T. A., and L. Weller. 2013. State of the River Report: Water Quality and River Health in  
918 the Metro Mississippi River. *Friends of the Mississippi River*.
- 919 Salter, S. J., M. J. Cox, E. M. Turek, S. T. Calus, W. O. Cookson, M. F. Moffatt, P. Turner, J.  
920 Parkhill, N. J. Loman, and A. W. Walker. 2014. Reagent and laboratory contamination can  
921 critically impact sequence-based microbiome analyses. *BMC Biol.* **12**: 87.
- 922 Savio, D., L. Sinclair, U. Z. Ijaz, J. Parajka, G. H. Reischer, P. Stadler, A. P. Blaschke, G.

- 923 Blöschl, R. L. Mach, A. K. T. Kirschner, A. H. Farnleitner, and A. Eiler. 2015. Bacterial  
924 diversity along a 2600 km river continuum. *Environ. Microbiol.* **17**: n/a-n/a.
- 925 Schilling, K. E., K.-S. Chan, H. Liu, and Y.-K. Zhang. 2010. Quantifying the effect of land use  
926 land cover change on increasing discharge in the Upper Mississippi River. *J. Hydrol.* **387**:  
927 343–345.
- 928 Schloss, P. D., S. L. Westcott, T. Ryabin, J. R. Hall, M. Hartmann, E. B. Hollister, R. a.  
929 Lesniewski, B. B. Oakley, D. H. Parks, C. J. Robinson, J. W. Sahl, B. Stres, G. G.  
930 Thallinger, D. J. Van Horn, and C. F. Weber. 2009. Introducing mothur: Open-source,  
931 platform-independent, community-supported software for describing and comparing  
932 microbial communities. *Appl. Environ. Microbiol.* **75**: 7537–7541.
- 933 Singh, V. 2012. Application of Frequency and Risk in Water Resources: Proceedings of the  
934 International Symposium on Flood Frequency and Risk Analyses, 14–17 May 1986,  
935 Louisiana State University, Baton Rouge, USA, Springer Science & Business Media.
- 936 Smith, M. W., L. Herfort, K. Tyrol, D. Suci, V. Campbell, B. C. Crump, T. D. Peterson, P.  
937 Zuber, A. M. Baptista, and H. M. Simon. 2010. Seasonal Changes in Bacterial and Archaeal  
938 Gene Expression Patterns across Salinity Gradients in the Columbia River Coastal Margin.  
939 *PLoS One* **5**: e13312.
- 940 Staley, C., T. J. Gould, P. Wang, J. Phillips, J. B. Cotner, and M. J. Sadowsky. 2014a. Bacterial  
941 community structure is indicative of chemical inputs in the Upper Mississippi River. *Front*  
942 *Microbiol* **5**: 524.
- 943 Staley, C., T. J. Gould, P. Wang, J. Phillips, J. B. Cotner, and M. J. Sadowsky. 2014b. Core  
944 functional traits of bacterial communities in the Upper Mississippi River show limited  
945 variation in response to land cover. *Front. Microbiol.* **5**: 414.
- 946 Staley, C., T. J. Gould, P. Wang, J. Phillips, J. B. Cotner, and M. J. Sadowsky. 2015. Species  
947 sorting and seasonal dynamics primarily shape bacterial communities in the Upper  
948 Mississippi River. *Sci. Total Environ.* **505**: 435–45.
- 949 Staley, C., T. J. Gould, P. Wang, J. Phillips, J. B. Cotner, and M. J. Sadowsky. 2016. Sediments  
950 and Soils Act as Reservoirs for Taxonomic and Functional Bacterial Diversity in the Upper  
951 Mississippi River. *Microb. Ecol.* **71**: 814–824.
- 952 Staley, C., T. Unno, G. TJ, B. Jarvis, J. Phillips, C. JB, T. J. Gould, B. Jarvis, J. Phillips, J. B.  
953 Cotner, and M. J. Sadowsky. 2013. Application of Illumina next-generation sequencing to  
954 characterize the bacterial community of the Upper Mississippi River. *J. Appl. Microbiol.*  
955 **115**: 1147–1158.
- 956 Tatangelo, V., A. Franzetti, I. Gandolfi, G. Bestetti, and R. Ambrosini. 2014. Effect of  
957 preservation method on the assessment of bacterial community structure in soil and water  
958 samples. *FEMS Microbiol. Lett.* **356**: 32–38.
- 959 Thrash, J. C., J. L. Weckhorst, and D. M. Pitre. 2015. Cultivating Fastidious Microbes, p. 1–22.  
960 *In* Protocols for Metagenomic Library Generation and Analysis in Petroleum Hydrocarbon  
961 Microbe Systems. Humana Press.
- 962 Trusova, M. Y., and M. I. Gladyshev. 2002. Phylogenetic diversity of winter bacterioplankton of  
963 eutrophic siberian reservoirs as revealed by 16S rRNA gene sequence. *Microb. Ecol.* **44**:  
964 252–259.
- 965 Turner, R. E., and N. N. Rabalais. 2003. Linking landscape and water quality in the Mississippi  
966 river basin for 200 years. *Bioscience* **53**: 563–572.
- 967 Turner, R. E., and N. N. Rabalais. 2004. Suspended sediment, C, N, P, and Si yields from the  
968 Mississippi River Basin. *Hydrobiologia* **511**: 79–89.

- 969 Vannote, R. L., G. W. Minshall, K. W. Cummins, J. R. Sedell, and C. E. Cushing. 1980. River  
970 continuum concept. *Can J Fish Aquat Sci* **37**: 130–137.
- 971 Vorosmarty, C. J., P. B. McIntyre, M. O. Gessner, D. Dudgeon, A. Prusevich, P. Green, S.  
972 Glidden, S. E. Bunn, C. A. Sullivan, C. R. Liermann, and P. M. Davies. 2010. Global  
973 threats to human water security and river biodiversity. *Nature* **467**: 555–561.
- 974 Weiss, S., A. Amir, E. R. Hyde, J. L. Metcalf, S. J. Song, and R. Knight. 2014. Tracking down  
975 the sources of experimental contamination in microbiome studies. *Genome Biol.* **15**: 564.
- 976 Withers, P. J. A., and H. P. Jarvie. 2008. Delivery and cycling of phosphorus in rivers: A review.  
977 *Sci. Total Environ.* **400**: 379–395.
- 978 Wood, S. A., M. J. Prentice, K. Smith, and D. P. Hamilton. 2010. Low dissolved inorganic  
979 nitrogen and increased heterocyte frequency: precursors to *Anabaena planktonica* blooms in  
980 a temperate, eutrophic reservoir. *J. Plankton Res.* **32**: 1315–1325.
- 981 Zeglin, L. H. 2015. Stream microbial diversity in response to environmental changes: review and  
982 synthesis of existing research. *Front. Microbiol.* **6**: 454.
- 983 Zwart, G., B. C. Crump, M. P. Kamst-van Agterveld, F. Hagen, and S. K. Han. 2002. Typical  
984 freshwater bacteria: An analysis of available 16S rRNA gene sequences from plankton of  
985 lakes and rivers. *Aquat. Microb. Ecol.* **28**: 141–155.
- 986  
987  
988  
989  
990  
991  
992  
993  
994



995  
996  
997

**Tables**

**Table 1.** Summary of the correlations between environmental variables and microbial community beta diversity ordination on NMDS plots in Figure 2. +/- designates the direction of the association between the environmental variable and NMDS axis

| Variable                           |                          | NMDS1           | NMDS2 | P-value | R <sup>2</sup> |                        | NMDS1           | NMDS2 | P-value | R <sup>2</sup> |
|------------------------------------|--------------------------|-----------------|-------|---------|----------------|------------------------|-----------------|-------|---------|----------------|
| <i>PO<sub>4</sub><sup>3-</sup></i> | 16S rRNA Gene 0.2-2.7 μm | +               | +     | 0.001   | 0.404          | 16S rRNA Gene > 2.7 μm | +               | +     | 0.001   | 0.575          |
| <i>SiSO<sub>4</sub></i>            |                          | -               | +     | 0.003   | 0.183          |                        | -               | -     | 0.015   | 0.115          |
| <i>NO<sub>3</sub><sup>-</sup></i>  |                          | +               | +     | 0.001   | 0.443          |                        | +               | +     | 0.001   | 0.33           |
| <i>NH<sub>4</sub><sup>+</sup></i>  |                          | -               | -     | 0.002   | 0.178          |                        | -               | -     | 0.004   | 0.189          |
| <i>NO<sub>2</sub><sup>-</sup></i>  |                          | Not significant |       |         |                |                        | Not significant |       |         |                |
| <i>River Speed</i>                 |                          | -               | -     | 0.001   | 0.261          |                        | -               | -     | 0.001   | 0.39           |
| <i>Water Temperature</i>           |                          | -               | -     | 0.001   | 0.385          |                        | -               | -     | 0.001   | 0.524          |
| <i>Turbidity</i>                   |                          | -               | -     | 0.001   | 0.409          |                        | -               | -     | 0.001   | 0.536          |
| <i>PO<sub>4</sub><sup>3-</sup></i> | 18S rRNA Gene 0.2-2.7 μm | +               | +     | 0.001   | 0.555          | 18S rRNA Gene > 2.7 μm | +               | -     | 0.001   | 0.486          |
| <i>SiSO<sub>4</sub></i>            |                          | -               | +     | 0.001   | 0.264          |                        | -               | -     | 0.001   | 0.265          |
| <i>NO<sub>3</sub><sup>-</sup></i>  |                          | Not significant |       |         |                |                        | +               | +     | 0.001   | 0.2            |
| <i>NH<sub>4</sub><sup>+</sup></i>  |                          | -               | +     | 0.019   | 0.106          |                        | Not significant |       |         |                |
| <i>NO<sub>2</sub><sup>-</sup></i>  |                          | Not significant |       |         |                |                        | Not significant |       |         |                |
| <i>River Speed</i>                 |                          | -               | -     | 0.001   | 0.282          |                        | -               | -     | 0.001   | 0.345          |
| <i>Water Temperature</i>           |                          | -               | -     | 0.001   | 0.29           |                        | -               | -     | 0.001   | 0.372          |
| <i>Turbidity</i>                   |                          | -               | -     | 0.001   | 0.272          |                        | -               | -     | 0.001   | 0.353          |

**Table 2.** Summary of the correlations between OTUs and microbial community beta diversity ordination on NMDS plots in Figure 2. +/- designates the direction of the association between the OTU and NMDS axis.

|                          | OTU           | Classification                 | NMDS1 | NMDS2 | P-value | R <sup>2</sup> |                        | OTU            | Classification                        | NMDS1 | NMDS2 | P-value | R <sup>2</sup> |
|--------------------------|---------------|--------------------------------|-------|-------|---------|----------------|------------------------|----------------|---------------------------------------|-------|-------|---------|----------------|
| 16S rRNA Gene 0.2-2.7 μm | <i>OTU372</i> | Unc. Bacteria                  | +     | -     | 0.0001  | 0.604          | 16S rRNA Gene > 2.7 μm | <i>OTU3</i>    | acI clade                             | +     | +     | 0.0001  | 0.796          |
|                          | <i>OTU135</i> | <i>Flavobacterium</i> sp.      | -     | -     | 0.0001  | 0.522          |                        | <i>OTU181</i>  | Unc. Bacillaceae                      | -     | +     | 0.0001  | 0.773          |
|                          | <i>OTU29</i>  | <i>Fluviicola</i> sp.<br>Unc.  | -     | -     | 0.0001  | 0.509          |                        | <i>OTU145</i>  | <i>Desulfosporosinus</i><br>sp.       | -     | +     | 0.0001  | 0.742          |
|                          | <i>OTU48</i>  | Microbacteriaceae              | -     | +     | 0.0001  | 0.508          |                        | <i>OTU13</i>   | Unc. Bacillales<br>Unc.               | -     | +     | 0.0001  | 0.740          |
|                          | <i>OTU115</i> | <i>Flavobacterium</i> sp.      | -     | +     | 0.0001  | 0.503          |                        | <i>OTU68</i>   | Micromonosporaceae                    | -     | +     | 0.0001  | 0.726          |
|                          | <i>OTU33</i>  | Unc. Holophagaceae             | +     | +     | 0.0001  | 0.501          |                        | <i>OTU202</i>  | Unc. Bacillales<br>Unc.               | -     | +     | 0.0001  | 0.725          |
|                          | <i>OTU161</i> | <i>Flavobacterium</i> sp.      | -     | -     | 0.0001  | 0.501          |                        | <i>OTU60</i>   | Gemmatimonadaceae                     | +     | +     | 0.0001  | 0.716          |
|                          | <i>OTU100</i> | <i>Clostridium</i> sp.<br>Unc. | +     | +     | 0.0001  | 0.497          |                        | <i>OTU89</i>   | Unc. Bacillales<br>Unc.               | -     | +     | 0.0001  | 0.702          |
|                          | <i>OTU85</i>  | Peptostreptococcaceae<br>Unc.  | +     | +     | 0.0001  | 0.496          |                        | <i>OTU169</i>  | Micromonosporaceae                    | -     | +     | 0.0001  | 0.698          |
|                          | <i>OTU62</i>  | Comamonadaceae                 | -     | +     | 0.0001  | 0.493          |                        | <i>OTU28</i>   | Unc. Planococcaceae                   | -     | +     | 0.0001  | 0.694          |
| 18S rRNA Gene 0.2-2.7 μm | <i>OTU1</i>   | Unc. Eukaryota                 | +     | +     | 0.0001  | 0.693          | 18S rRNA Gene > 2.7 μm | <i>OTU1</i>    | Unc. Eukaryote                        | +     | +     | 0.0001  | 0.870          |
|                          | <i>OTU63</i>  | Unc. Ochrophyta                | -     | -     | 0.0001  | 0.645          |                        | <i>OTU222</i>  | Unc. Ochrophyta                       | +     | +     | 0.0001  | 0.806          |
|                          | <i>OTU241</i> | Unc. Ochrophyta                | -     | +     | 0.0001  | 0.642          |                        | <i>OTU3</i>    | Unc. Stramenopiles                    | +     | -     | 0.0001  | 0.796          |
|                          | <i>OTU133</i> | Unc. Ochrophyta                | -     | +     | 0.0001  | 0.632          |                        | <i>OTU1984</i> | Unc. Eukaryote                        | +     | -     | 0.0001  | 0.794          |
|                          | <i>OTU219</i> | Unc. Eukaryota                 | +     | +     | 0.0001  | 0.630          |                        | <i>OTU345</i>  | Unc. Ochrophyta<br>Unc.               | -     | -     | 0.0001  | 0.792          |
|                          | <i>OTU113</i> | Unc. Alveolata                 | +     | +     | 0.0001  | 0.616          |                        | <i>OTU112</i>  | Cryptomonadales                       | +     | +     | 0.0001  | 0.779          |
|                          | <i>OTU154</i> | Unc. Ochrophyta                | -     | -     | 0.0001  | 0.598          |                        | <i>OTU63</i>   | Unc. Eukaryote<br>Chrysophyceae clone | +     | +     | 0.0001  | 0.773          |
|                          | <i>OTU481</i> | Unc. Eukaryota                 | -     | -     | 0.0001  | 0.598          |                        | <i>OTU154</i>  | P34.45                                | -     | -     | 0.0001  | 0.773          |
|                          | <i>OTU457</i> | Unc. Eukaryota                 | -     | -     | 0.0001  | 0.596          |                        | <i>OTU155</i>  | Bacillariophytina                     | +     | +     | 0.0001  | 0.765          |
|                          | <i>OTU3</i>   | Unc. Stramenopile              | +     | +     | 0.0001  | 0.594          |                        | <i>OTU1146</i> | Unc. Eukaryote                        | +     | +     | 0.0001  | 0.765          |

998  
999  
1000  
1001  
1002

**Table 3.** Correlations between prokaryotic and eukaryotic submodules to nitrate and phosphate, as well as PLS model results

| <i>Fraction</i>       | <i>Gene</i> | <i>Nutrient</i>    | <i>Submodule</i> | <i>Eigen Correlations</i> | <i>Total OTUs</i> | <i>PLS model</i>                       |
|-----------------------|-------------|--------------------|------------------|---------------------------|-------------------|----------------------------------------|
| 0.2-2.7 $\mu\text{m}$ | 16S         | $\text{NO}_3^{2-}$ | Blue             | R = 0.6, P = 7e-08        | 77                | $R^2=0.35$ ; R = 0.65, P = 1.e-09      |
| > 2.7 $\mu\text{m}$   | 16S         | $\text{NO}_3^{2-}$ | Brown            | R = 0.56, P = 3e-07       | 133               | $R^2 = 0.69$ ; R = 0.83, P = < 2.2e-16 |
| 0.2-2.7 $\mu\text{m}$ | 16S         | $\text{PO}_4^{3-}$ | Turquoise        | R = 0.53, P = 2e-06       | 51                | $R^2=0.80$ ; R = 0.89, P = < 2.3e-16   |
| > 2.7 $\mu\text{m}$   | 16S         | $\text{PO}_4^{3-}$ | Yellow           | R = 0.53, P = 1e-06       | 80                | $R^2 = 0.48$ ; R = 0.77, P = 4.88e-15  |
| 0.2-2.7 $\mu\text{m}$ | 18S         | $\text{NO}_3^{2-}$ | Green            | R = 0.39, P = 6e-04       | 39                | $R^2=0.38$ ; R = 0.62, P = 2.97e-9     |
| > 2.7 $\mu\text{m}$   | 18S         | $\text{NO}_3^{2-}$ | Brown            | R = 0.52, P = 2e-06       | 59                | $R^2=0.572$ ; R = 0.759, P = 6.7e-15   |
| 0.2-2.7 $\mu\text{m}$ | 18S         | $\text{PO}_4^{3-}$ | Turquoise        | R = 0.56, P = 2e-07       | 56                | $R^2=0.80$ ; R = 0.89, P = < 2e-16     |
| > 2.7 $\mu\text{m}$   | 18S         | $\text{PO}_4^{3-}$ | Red              | R = 0.60, P = 2e-08       | 39                | $R^2 = 0.618$ ; R = 0.799, P = < 2e-16 |

1003



1004

## 1005 **Figure Legends**

1006

1007 **Figure 1.** Sampling map (A) with graph inserts that represent the measured discharge rate (cubic  
1008 meter second<sup>-1</sup> [cms]) as recorded on the USGS gauges, and six environmental parameters  
1009 measured along the transect, according to concentration or visible depth of secchi disk by  
1010 distance (B). Throughout the figure and text, blue and red dots represent sampling  
1011 locations above and below the Missouri River confluence, respectively, and are designated  
1012 throughout as “upper” and “lower.” Cell Counts only represent the Planktonic (< 2.7 μm)  
1013 fraction.

1014 **Figure 2.** Non-metric multidimensional scaling (NMDS) results for whole community. The four  
1015 plots represent > 2.7 μm (A, C) and 0.2-2.7 μm (B, D) fractions for the 16S (A, B) and  
1016 18S (C, D) rRNA gene communities.

1017 **Figure 3.** Relative abundance, according to transect distance, for the top 6 and 5 phyla in the 16S  
1018 rRNA gene > 2.7 μm (A) and 0.2-2.7 μm (B) communities and 18S rRNA gene > 2.7 μm  
1019 (C) and 0.2-2.7 μm (D) communities, respectively. Non-linear regressions with 95% CI  
1020 (gray shading) are provided for reference.

1021 **Figure 4.** Core microbiome aggregate abundance for the 16S (A) and 18S (B) rRNA gene. In  
1022 each, triangles and circles points represent 0.2-2.7 μm and > 2.7 μm fractions,  
1023 respectively. Non-linear regressions with 95% confidence intervals (CI) (gray shading) are  
1024 provided for reference.

1025 **Figure 5.** PLS results for the 16S rRNA gene community submodules most associated with  
1026 phosphate (A) and nitrate (B). OTU correlation with a given nutrient is indicated on the y-  
1027 axis according to the number of co-correlations (node centrality) on the x-axis.  
1028 Community fractions: 0.2-2.7 μm (A) and > 2.7 μm (B). Circle size is proportional to VIP

1029 scores, with top 10 VIP scoring and top node centrality OTUs labeled with their highest-  
1030 resolution taxonomic classification and OTU number. Colors represent the taxonomic  
1031 classification the phylum level. For all OTU taxonomic designations resulting from this  
1032 analysis, see Table S1 “16S 0.2-2.7 $\mu$ m PO<sub>4</sub>” and “16S > 2.7 $\mu$ m NO<sub>3</sub>”.

1033 **Figure 6.** PLS results for the 18S rRNA gene community submodules most associated with  
1034 phosphate and nitrate. OTU correlation with a given nutrient is indicated on the y-axis  
1035 according to the number of co-correlations (node centrality) on the x-axis. Community  
1036 fractions: 0.2-2.7  $\mu$ m (A) and > 2.7  $\mu$ m (B, C). Circle size is proportional to VIP scores,  
1037 with top 10 VIP scoring and top node centrality OTUs labeled with their highest-  
1038 resolution taxonomic classification and OTU number. Colors represent the taxonomic  
1039 classification the phylum level. For all OTU taxonomic designations resulting from this  
1040 analysis, see Table S1 “18S 0.2-2.7 $\mu$ m NO<sub>3</sub>”, “16S > 2.7 $\mu$ m PO<sub>4</sub>”, and “16S >2.7 $\mu$ m  
1041 NO<sub>3</sub>”

1042

### 1043 **Supplemental Figure Legends**

1044

1045 **Figure S1.** NMDS results for the 16S (A) and 18S (B) rRNA gene communities. In each, circles  
1046 and triangles represent the > 2.7  $\mu$ m and 0.2-2.7  $\mu$ m fractions, respectively.

1047 **Figure S2.** Hclust results for the 16S (A) and 18S (B) rRNA gene communities.

1048 **Figure S3.** Separated upper and lower MSR Richness and Evenness indexes for the 16S > 2.7  
1049  $\mu$ m (A) and 0.2-2.7  $\mu$ m (B) and 18S > 2.7 (C) and 0.2-2.7  $\mu$ m (D) communities. Linear  
1050 regressions with 95% CI (gray shading) are provided for reference.

1051 **Figure S4.** Relative abundance, by phylum, according to transect distance, for phyla accounting

1052 for > 0.1% of the total reads for the 16S rRNA (A, B) and 18S rRNA genes (C, D) > 2.7  
1053  $\mu\text{m}$  (A, C) and 0.2-2.7  $\mu\text{m}$  (B, D) communities. Non-linear regressions with 95% CI (gray  
1054 shading) are provided for reference.

1055 **Figure S5.** Separated upper and lower MSR core microbiome aggregate abundance for the 16S  
1056 rRNA gene communities. For the upper and lower river, the core microbiome was defined  
1057 separately requiring OTUs to have greater than one read in 90% of the samples. > 2.7  $\mu\text{m}$   
1058 (A) and 0.2-2.7  $\mu\text{m}$  (B) 16S rRNA gene communities in the upper and lower MSR.

1059 **Figure S6.** PLS results for the 0.2-2.7  $\mu\text{m}$  and > 2.7  $\mu\text{m}$  16S (A-D) and 18S (E-H) rRNA gene  
1060 community for selected submodules with nitrate and phosphate and a VIP score > 1.  
1061 Correlation of submodule OTUs to nitrate and phosphate according to the number of co-  
1062 correlations (node centrality) for 0.2-2.7  $\mu\text{m}$  (A, B, E, F) and > 2.7  $\mu\text{m}$  (C, D, G, H) 16S  
1063 and 18S rRNA gene communities. Circle size is proportional to VIP scores, with top 10  
1064 VIP scoring and top node centrality OTUs labeled with their highest-resolution taxonomic  
1065 classification and OTU number. Colors represent the taxonomic classification the phylum  
1066 level.

1067 **Figure S7.** WCGNA results for 0.2-2.7  $\mu\text{m}$  16S rRNA gene community submodules of interest  
1068 based on Pearson correlations to environmental measurements (A). Color shading depicts  
1069 the strength of the Pearson correlation with individual submodule's eigenvalue. Boxes  
1070 indicate the selected submodule with its Pearson correlation and P-value. Graphs of the  
1071 relationship between the selected submodule OTUs and the strength of the individual  
1072 OTUs to nitrate (B) and phosphate (D). PLS regression of the predicted nutrient  
1073 concentrations versus measured nutrient concentrations (C, E) using the corresponding  
1074 selected submodules. Linear regressions with 95% CI (gray shading) are provided for

1075 reference.

1076 **Figure S8.** WCGNA results for 0.2-2.7  $\mu\text{m}$  18S rRNA gene community submodules of interest  
1077 based on Pearson correlations to environmental measurements (A). Color shading depicts  
1078 the strength of the Pearson correlation with individual submodule's eigenvalue. Boxes  
1079 indicate the selected submodule with its Pearson correlation and P-value. Graphs of the  
1080 relationship between the selected submodule OTUs and the strength of the individual  
1081 OTUs to nitrate (B) and phosphate (D). PLS regression of the predicted nutrient  
1082 concentrations versus measured nutrient concentrations (C, E) using the corresponding  
1083 selected submodules. Linear regressions with 95% CI (gray shading) are provided for  
1084 reference.

1085 **Figure S9.** WCGNA results for  $> 2.7 \mu\text{m}$  16S rRNA gene community submodules of interest  
1086 based on Pearson correlations to environmental measurements (A). Color shading depicts  
1087 the strength of the Pearson correlation with individual submodule's eigenvalue. Boxes  
1088 indicate the selected submodule with its Pearson correlation and P-value. Graphs of the  
1089 relationship between the selected submodule OTUs and the strength of the individual  
1090 OTUs to nitrate (B) and phosphate (D). PLS regression of the predicted nutrient  
1091 concentrations versus measured nutrient concentrations (C, E) using the corresponding  
1092 selected submodules. Linear regressions with 95% CI (gray shading) are provided for  
1093 reference.

1094 **Figure S10.** WCGNA results for  $> 2.7 \mu\text{m}$  18S rRNA gene community submodules of interest  
1095 based on Pearson correlations to environmental measurements (A). Color shading depicts  
1096 the strength of the Pearson correlation with individual submodule's eigenvalue. Boxes  
1097 indicate the selected submodule with its Pearson correlation and P-value. Graphs of the

1098 relationship between the selected submodule OTUs and the strength of the individual  
1099 OTUs to nitrate (B) and phosphate (D). PLS regression of the predicted nutrient  
1100 concentrations versus measured nutrient concentrations (C, E) using the corresponding  
1101 selected submodules. Linear regressions with 95% CI (gray shading) are provided for  
1102 reference.

1103

#### 1104 **Supporting Tables**

1105 Supplemental Table S1 is a spreadsheet, TableS1.xlsx. Tabs include General Information,  
1106 Spearman Rank, 0.2-2.7  $\mu\text{m}$  and  $> 2.7 \mu\text{m}$  16S and 18S rRNA gene Core communities, 0.2-2.7  
1107  $\mu\text{m}$  and  $> 2.7 \mu\text{m}$  16S and 18S rRNA WGCNA, and 16S and 18S rRNA gene OTU tables  
1108 (trimmed and normalized).

1109

1110 Additional Supplemental Information, including R scripts, Table S1, and our Mothur workflow  
1111 are hosted on the Thrash Lab website at: [thethrashlab.com/publications](http://thethrashlab.com/publications).

**Figure 1A**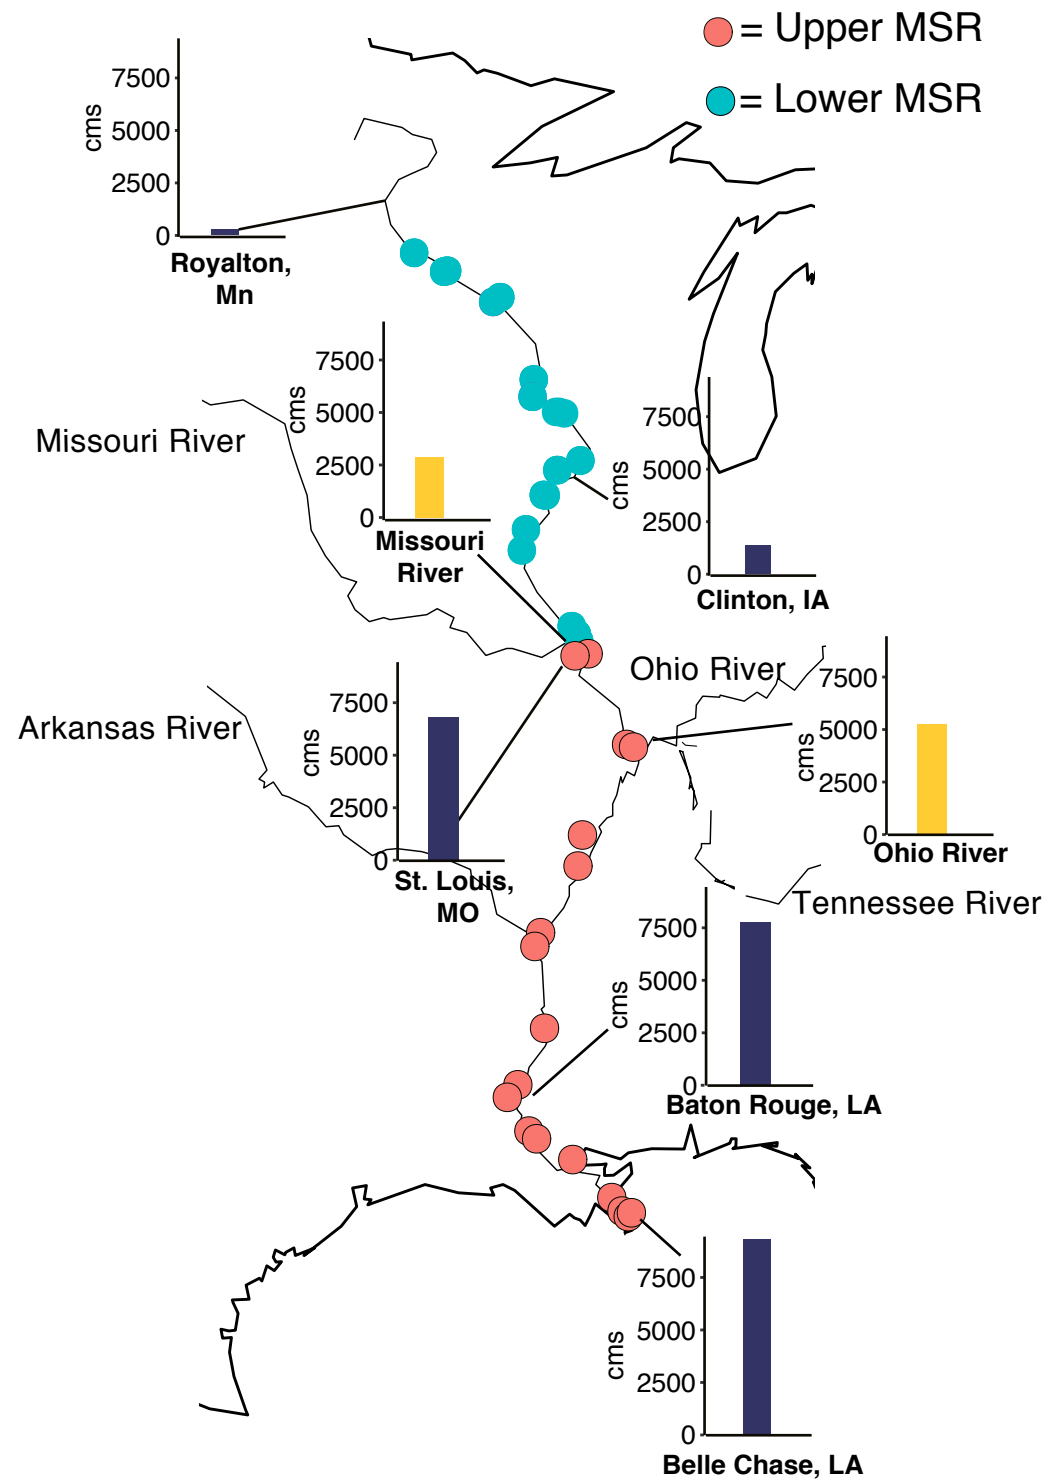**B**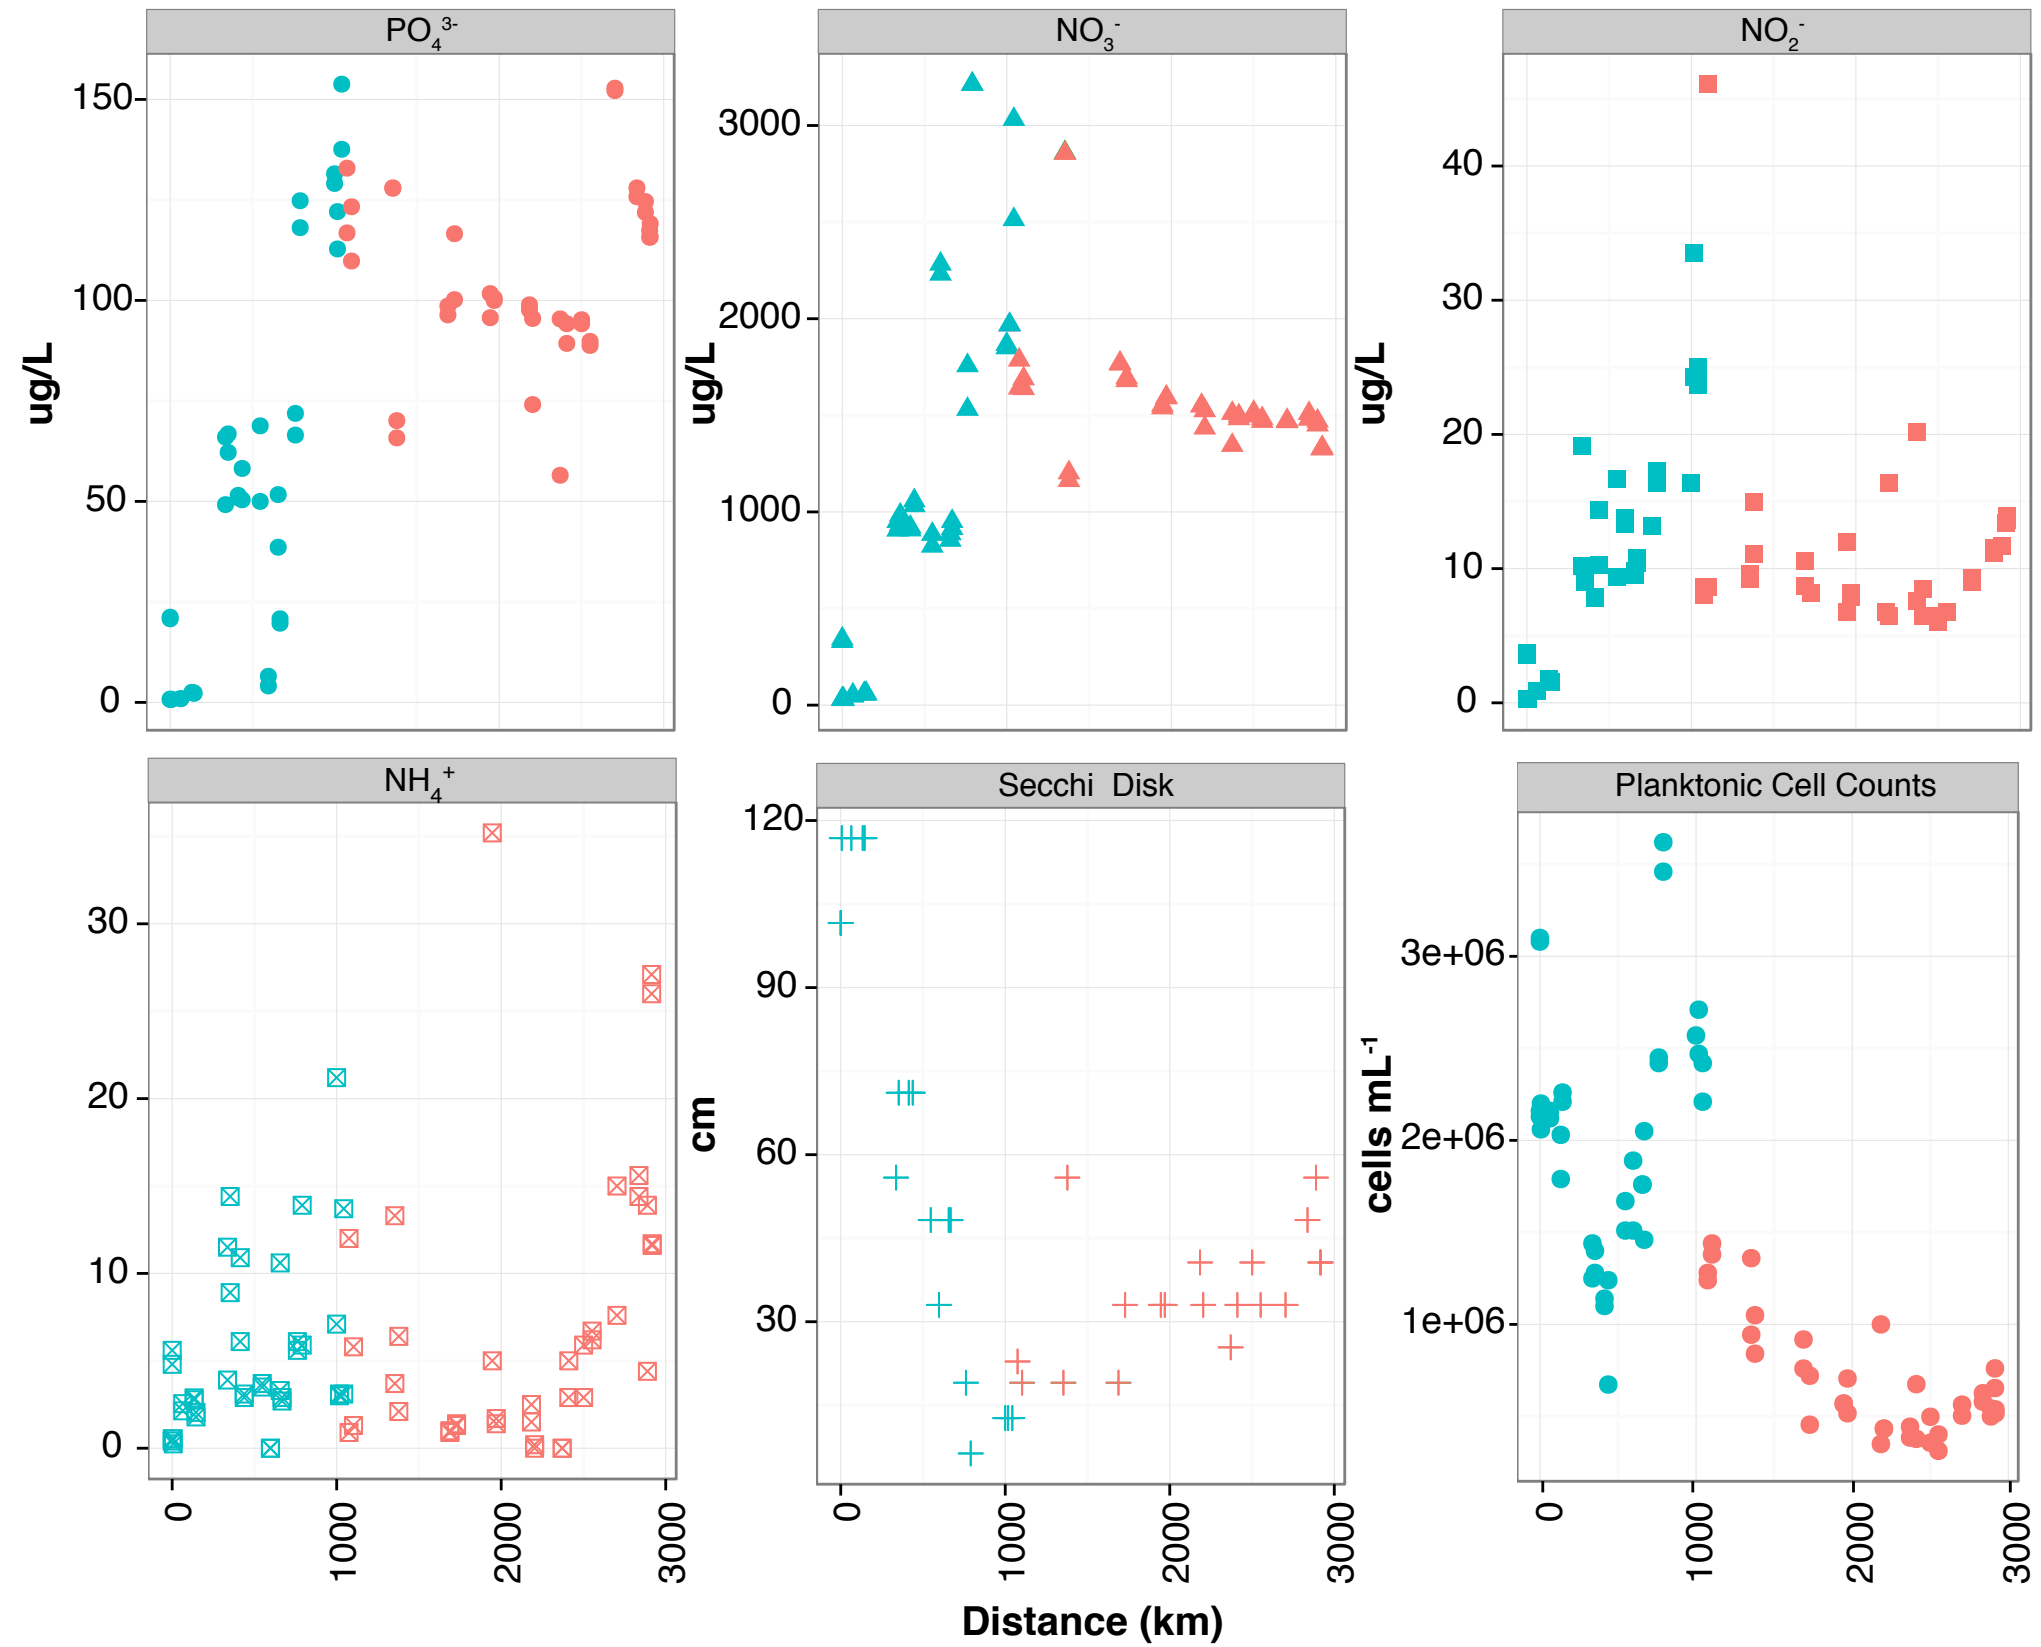

**Figure 2A**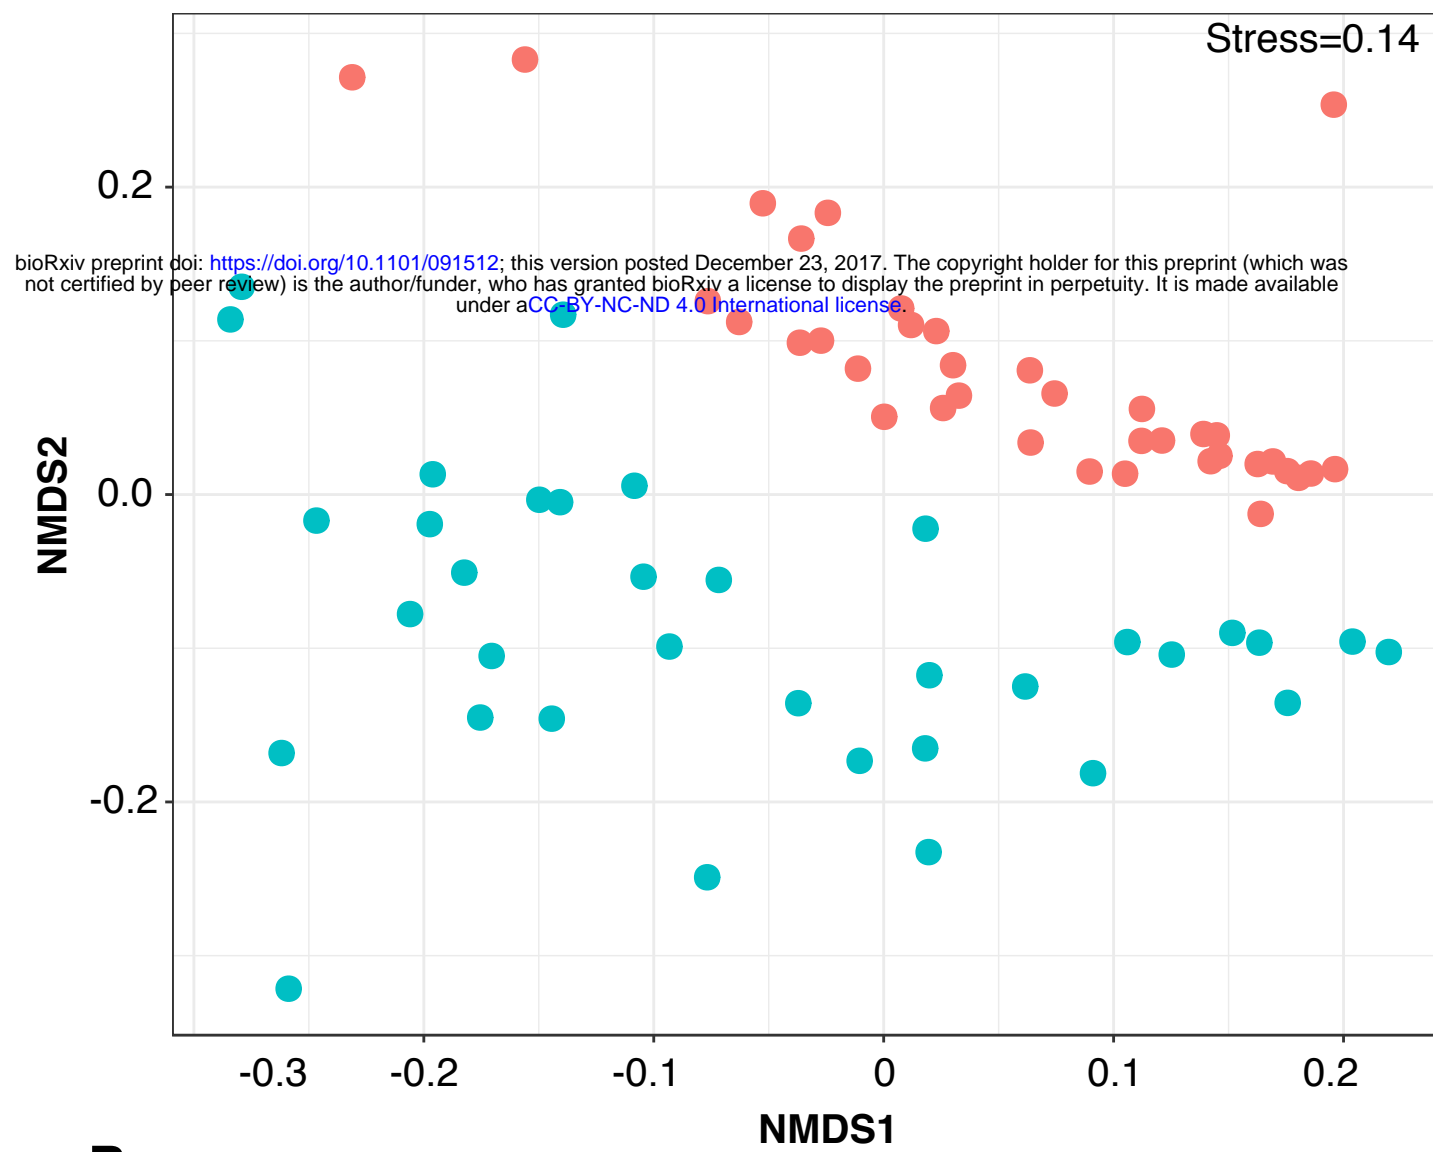**C**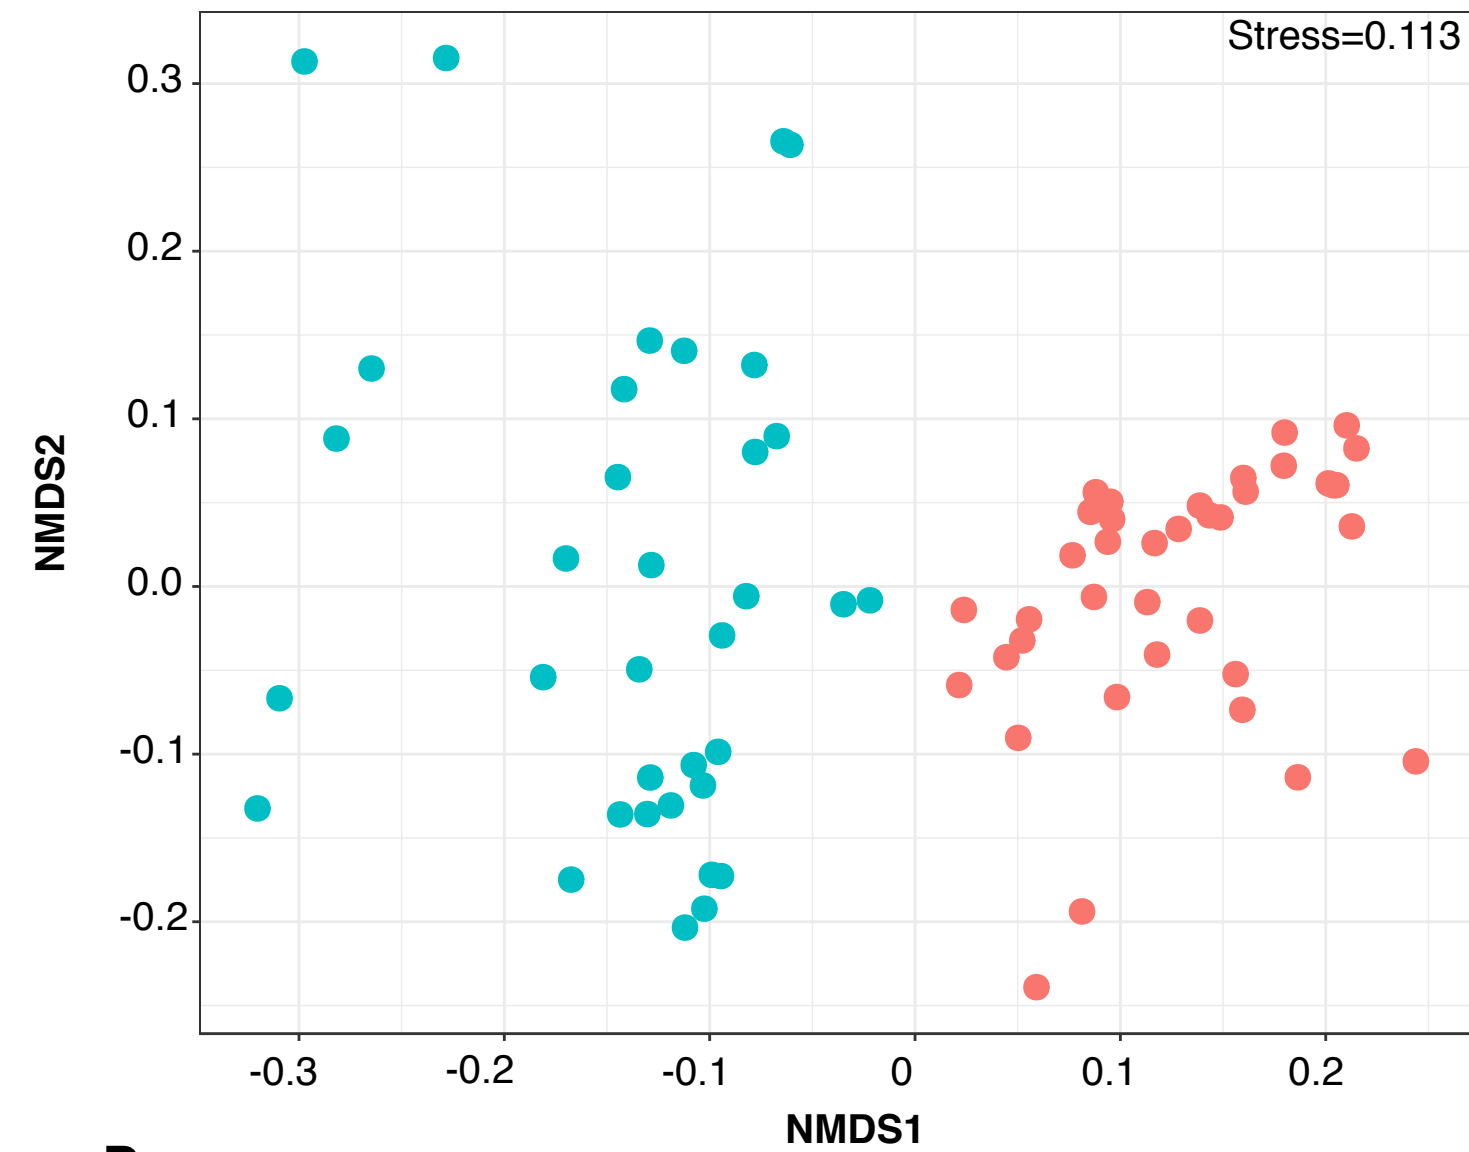**B**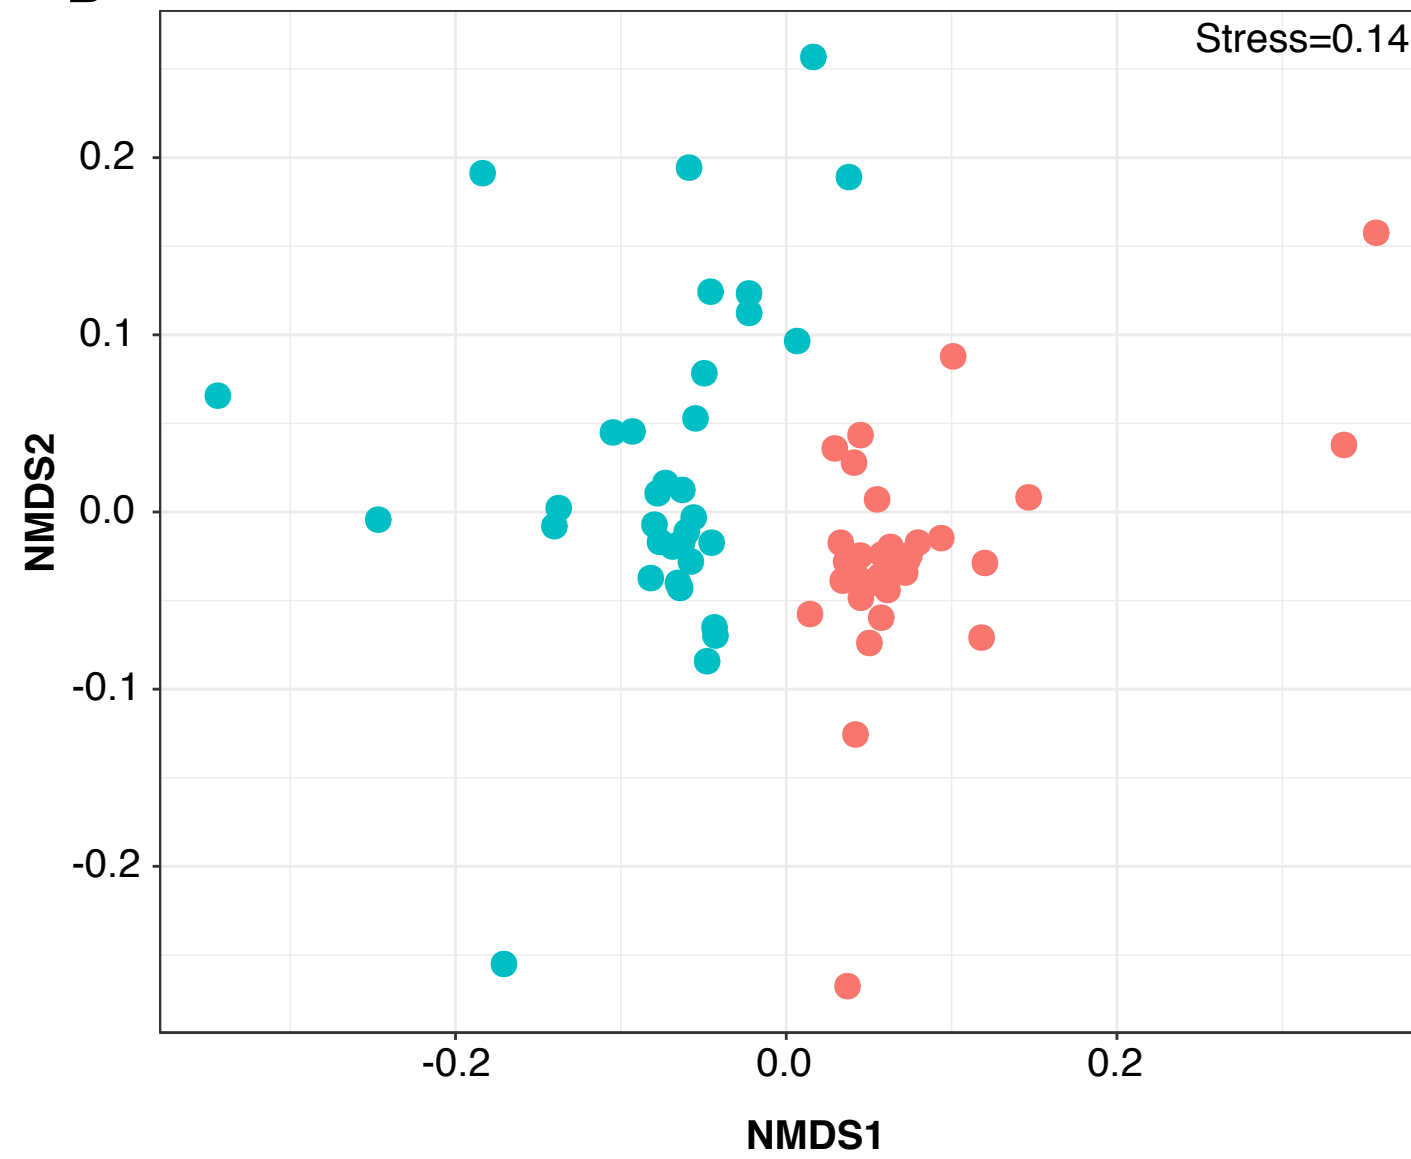**D**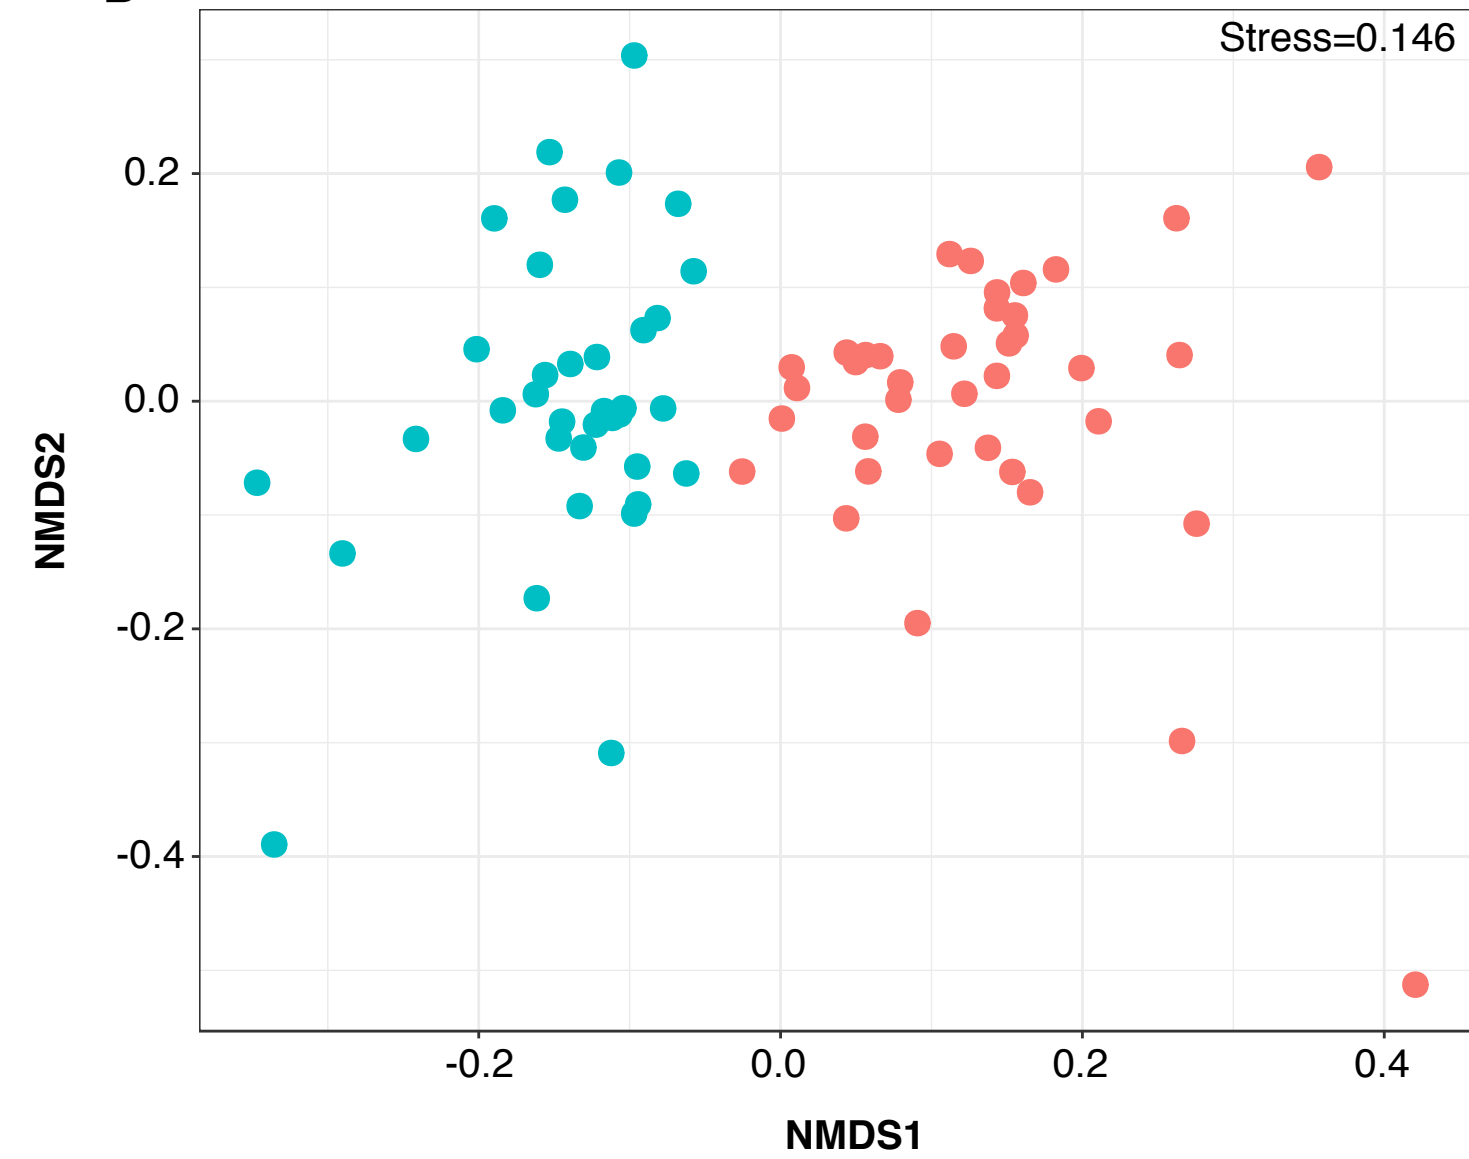

**Figure 3A**

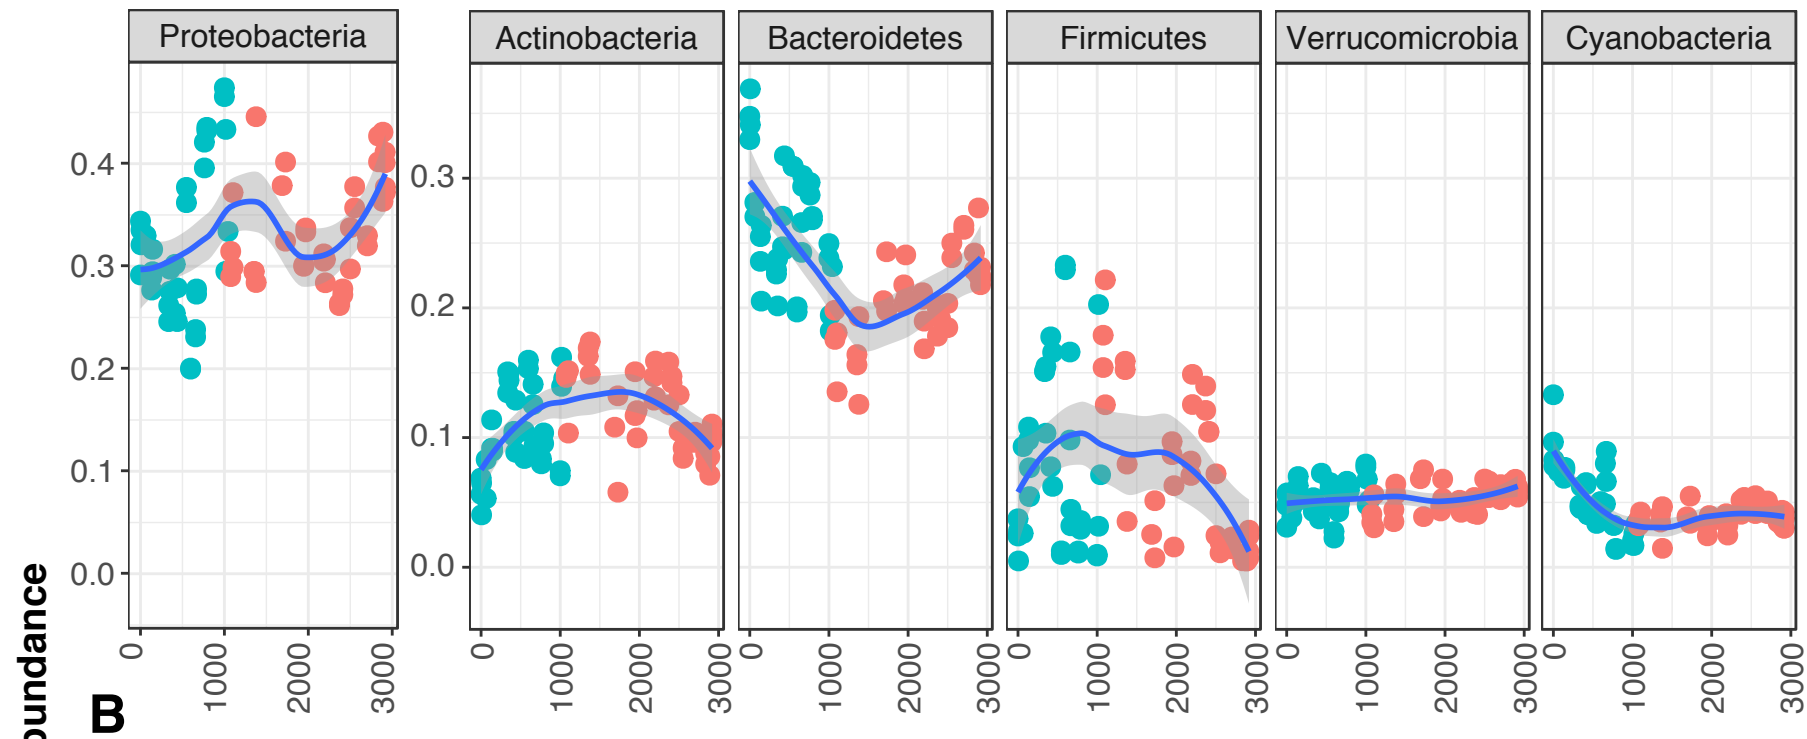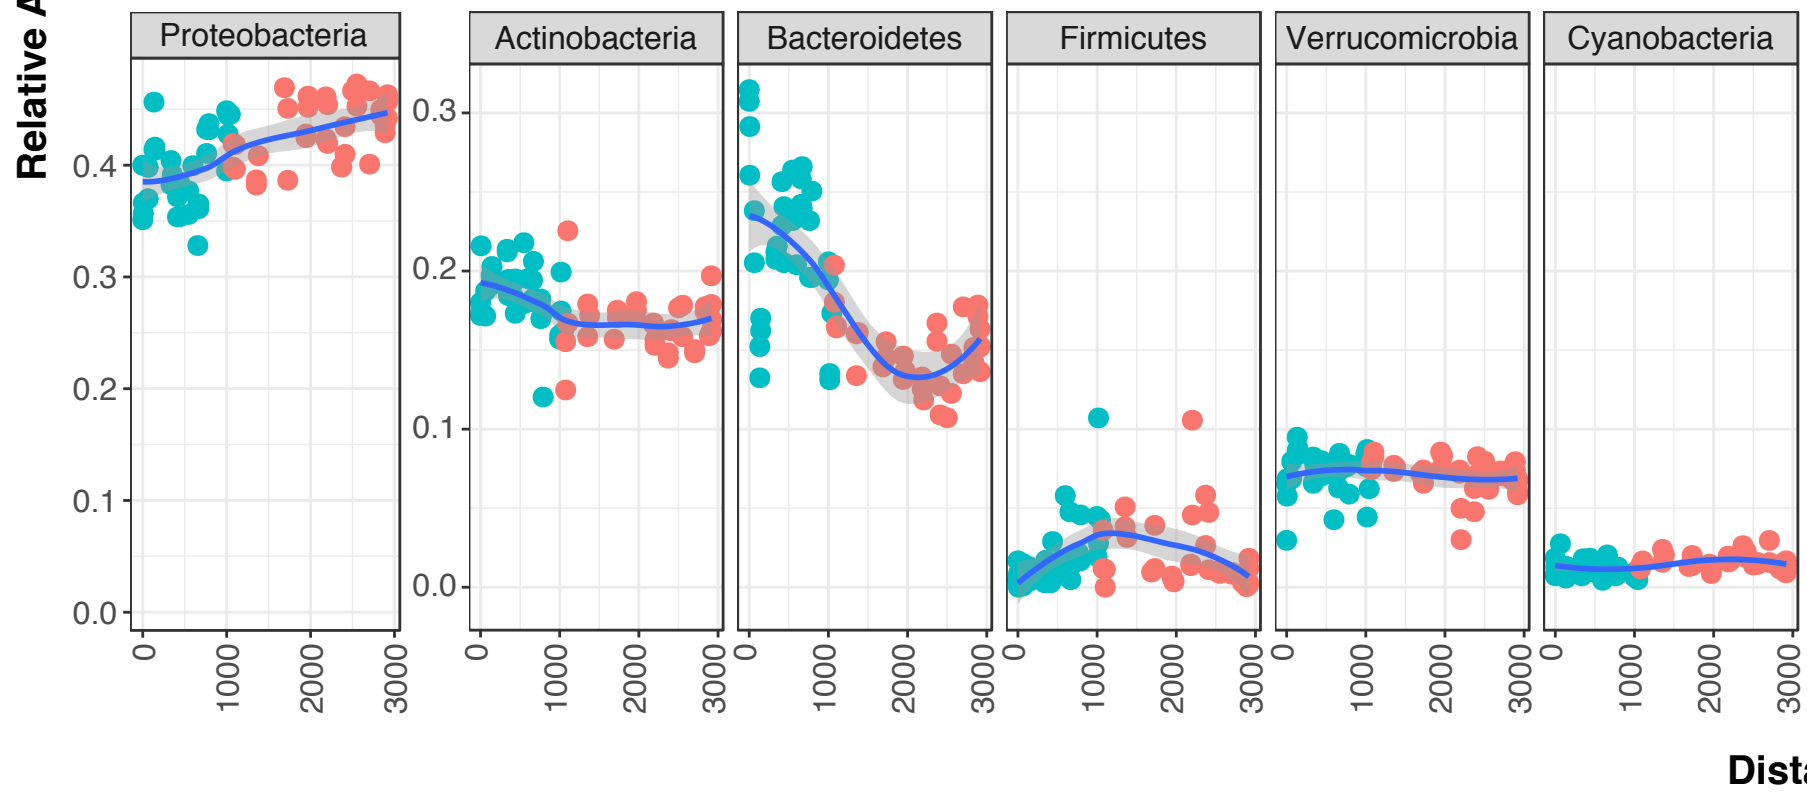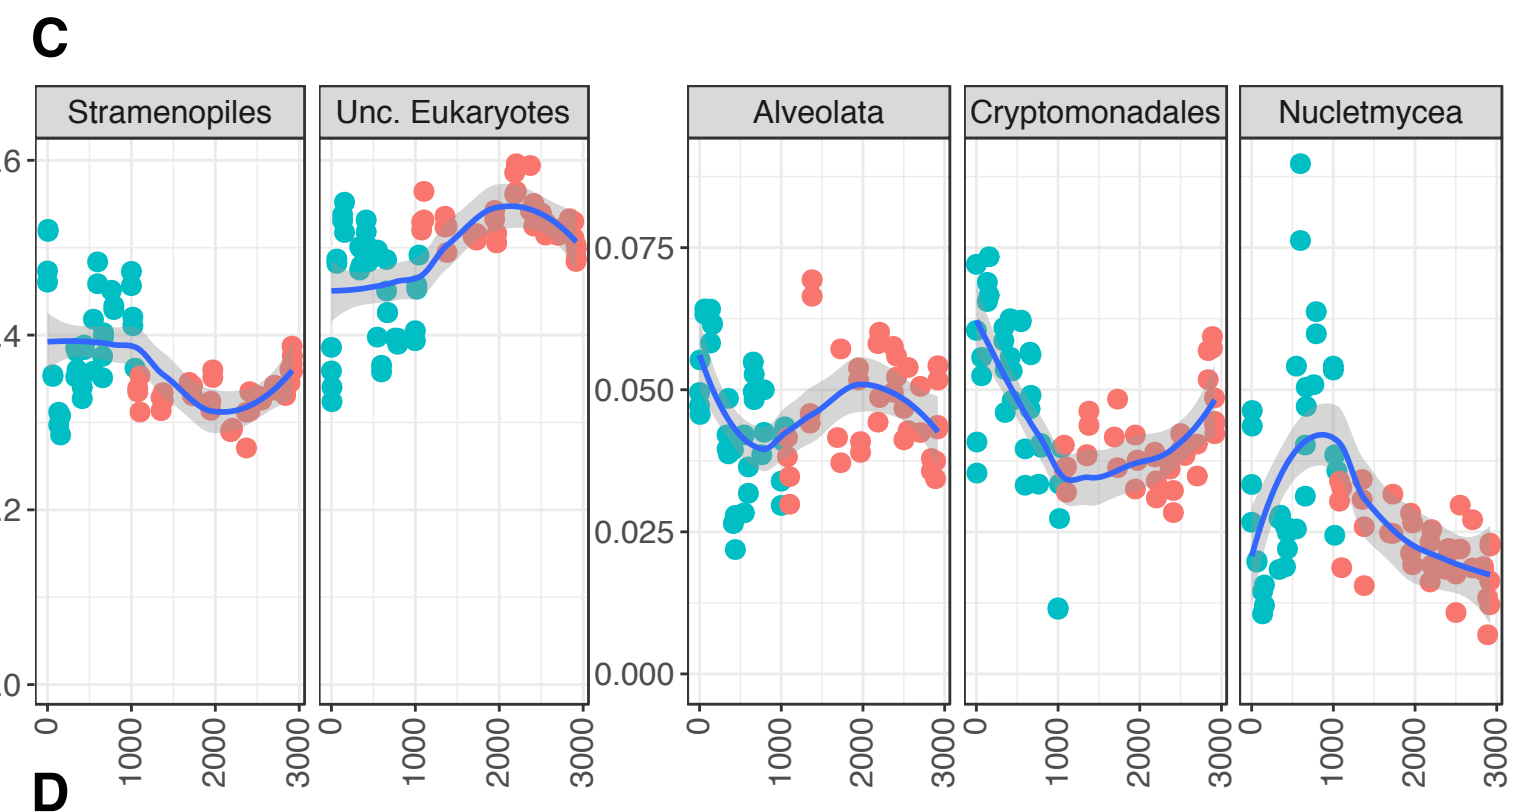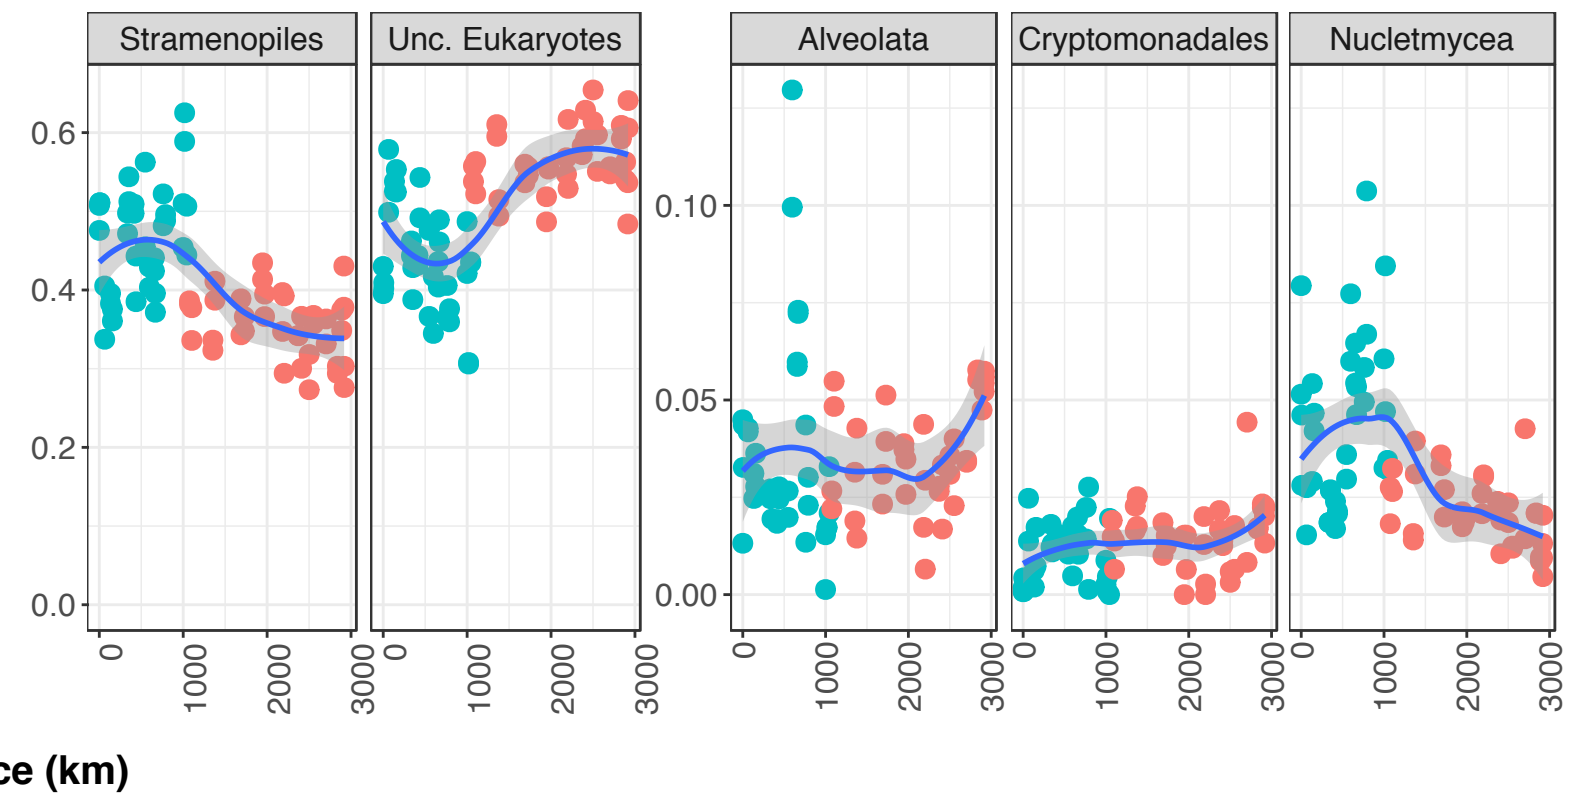

**Distance (km)**



Figure 4A

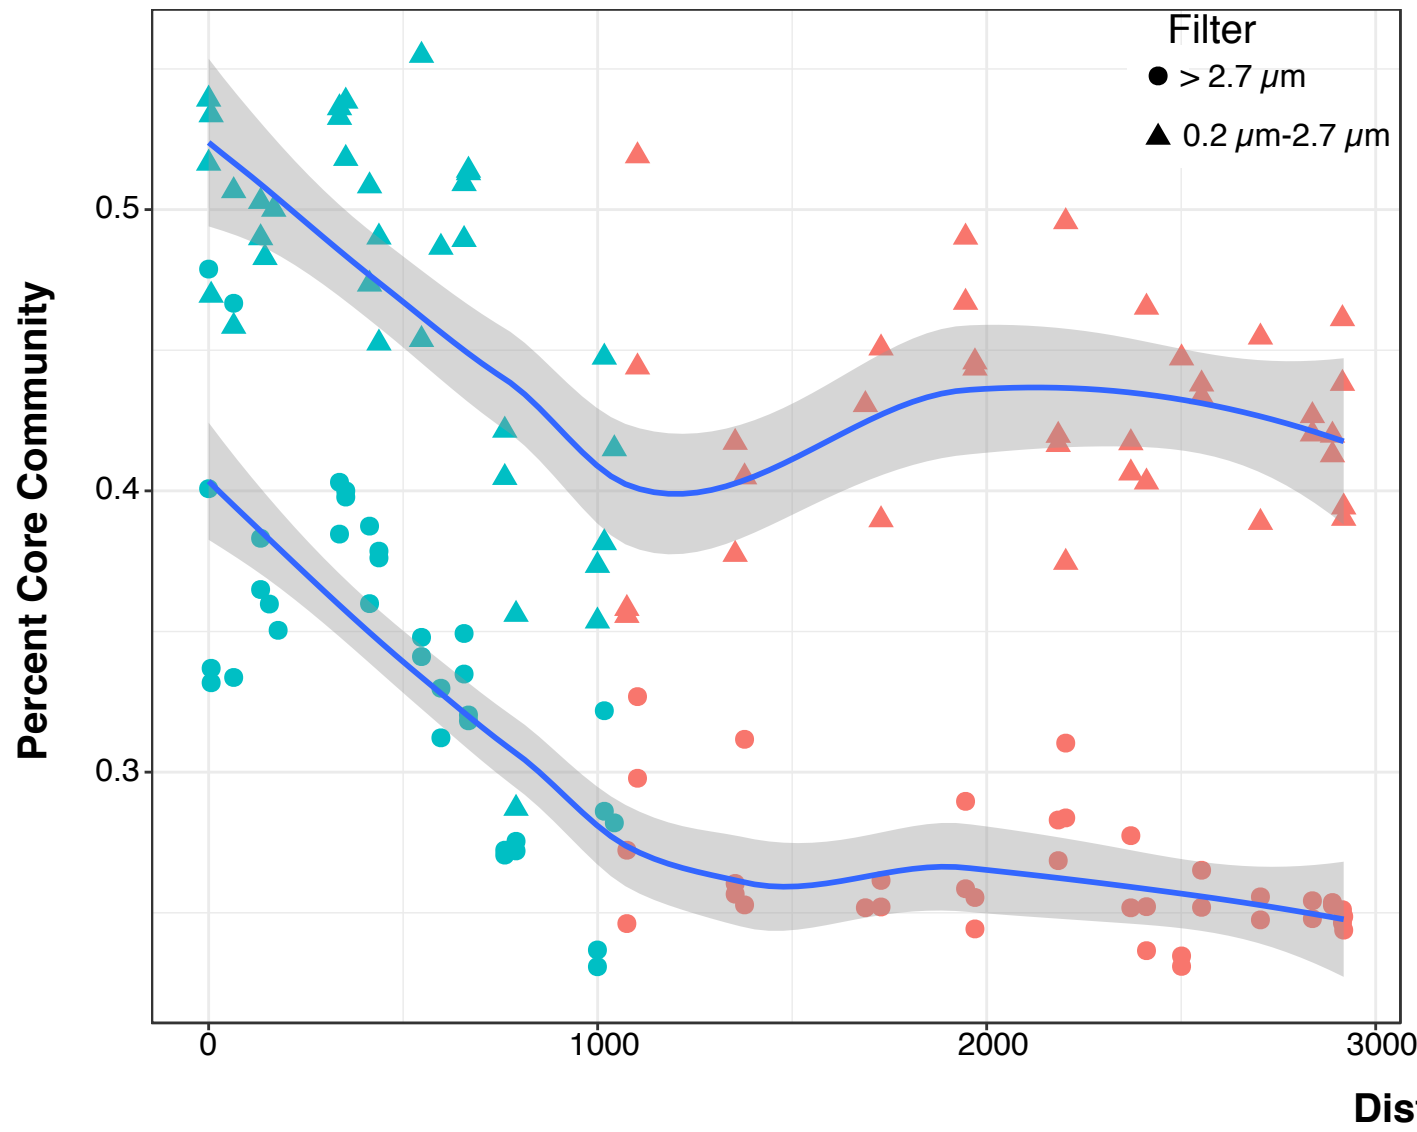

B

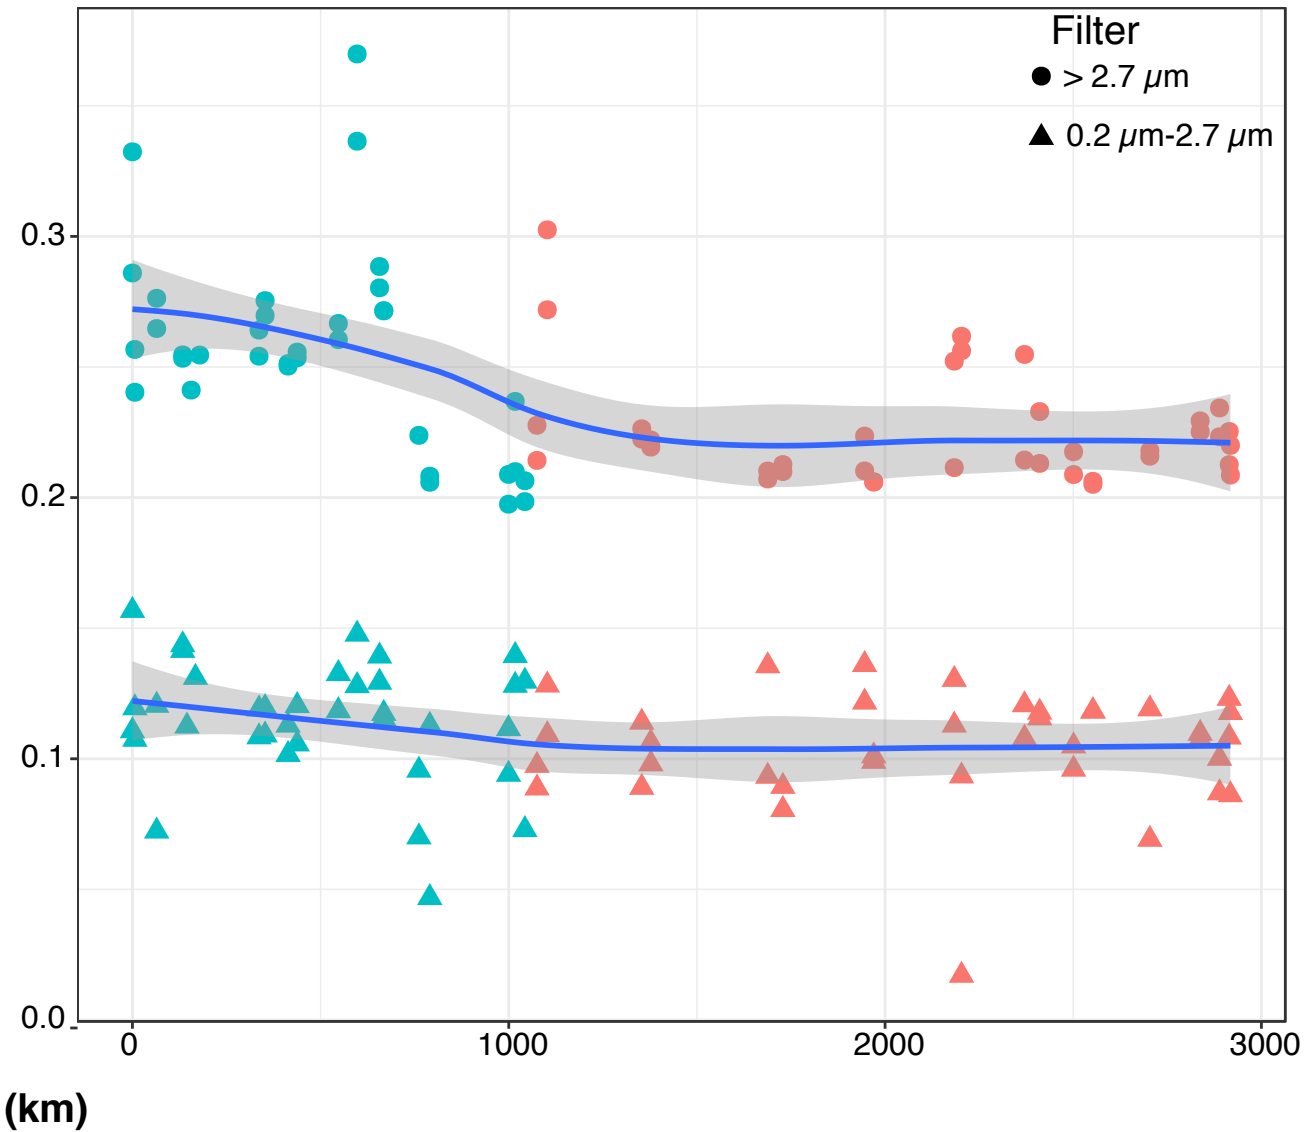

**Figure 5A**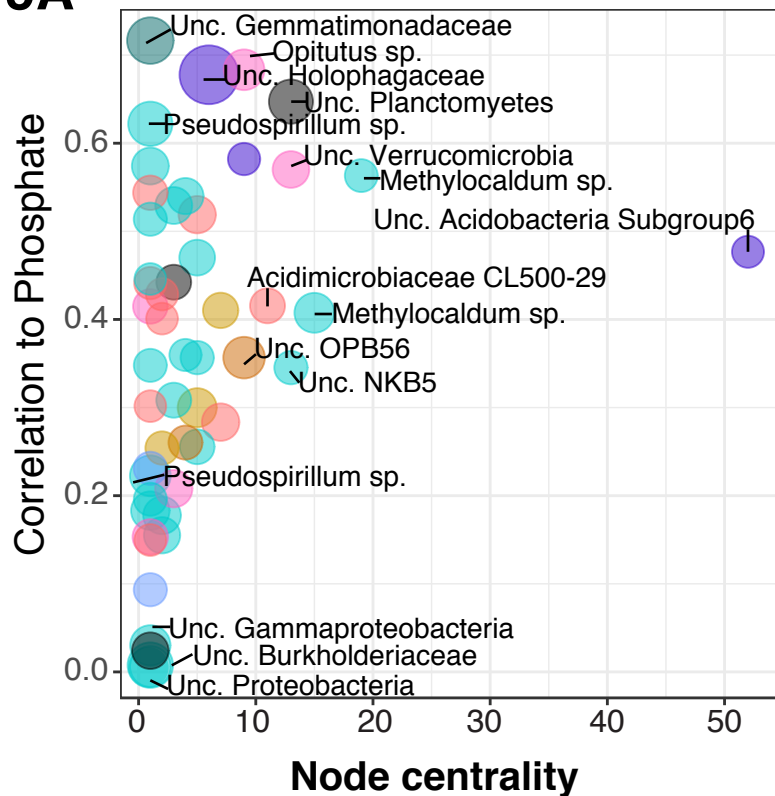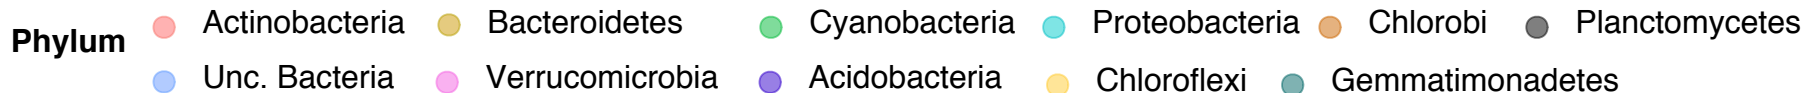**B**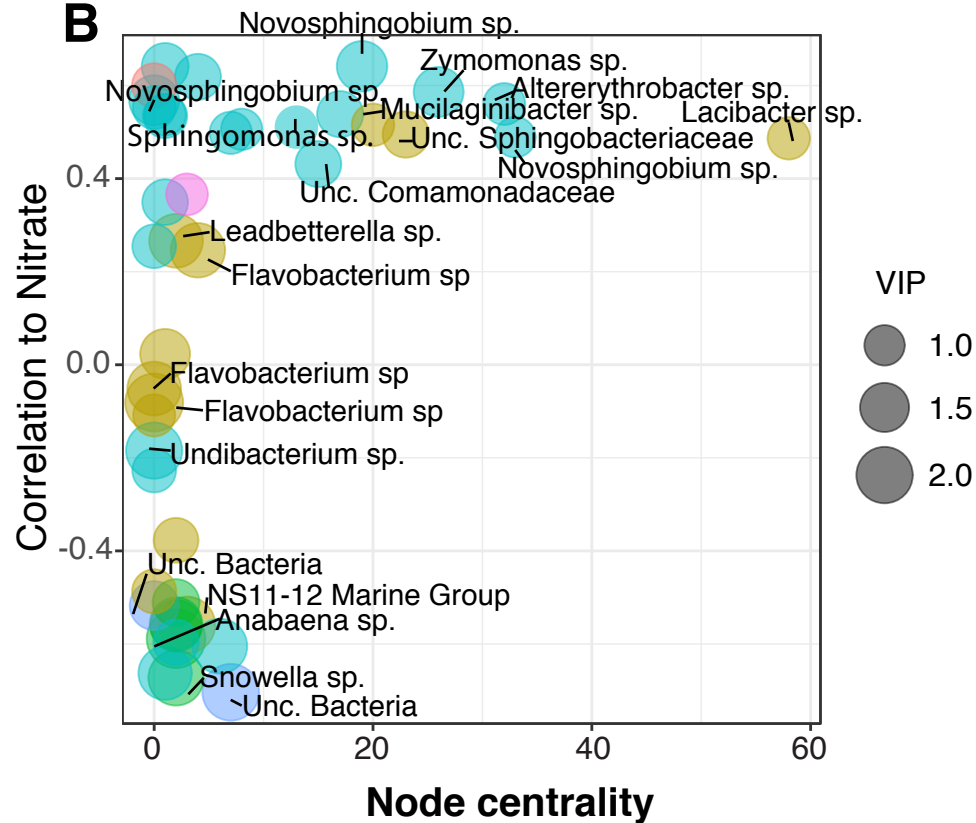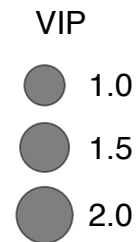

**Figure 6A**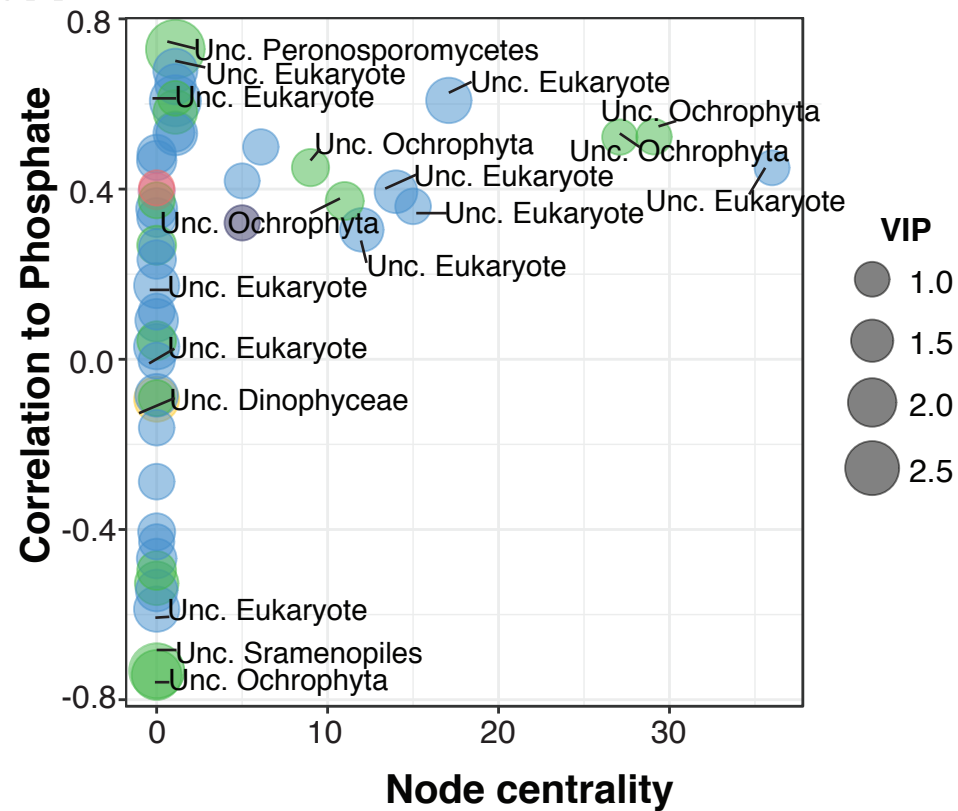**B**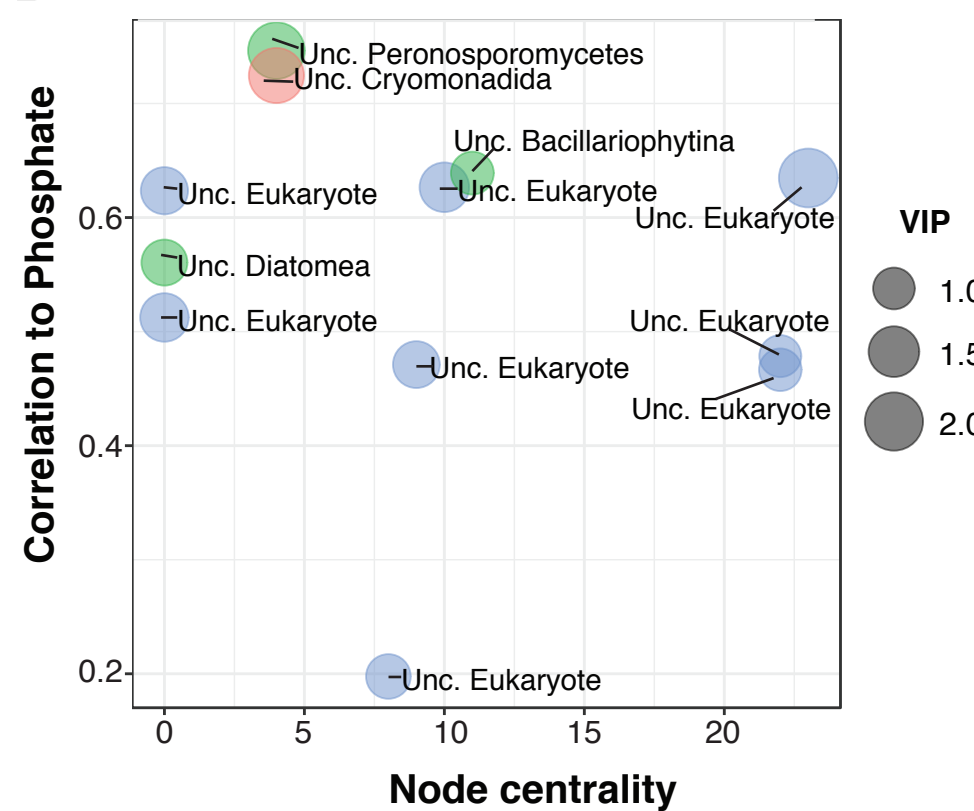**C**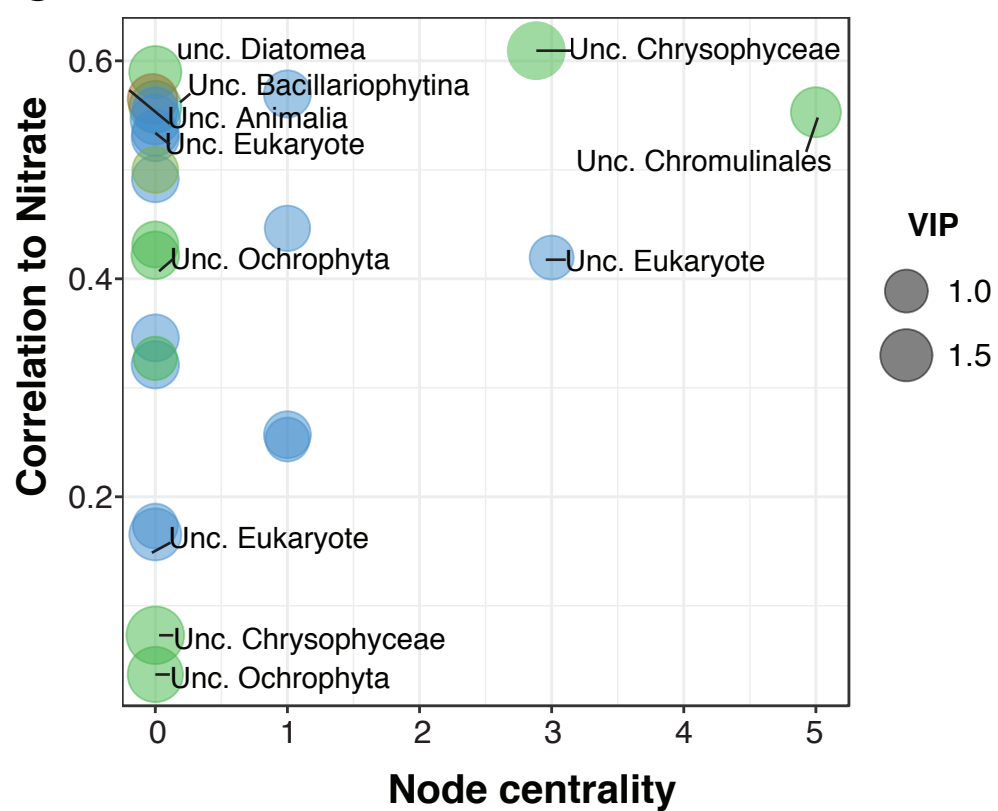

Source: https://www.biorxiv.org/content/10.1101/091512v5.full.pdf
